# Supplementary material for: The effect of renin–angiotensin–aldosterone system inhibitors on continuous and binary kidney outcomes in subgroups of patients with diabetes: a meta-analysis of randomized clinical trials
Source: Springer Nature journal article supplement (doi:10.1186/s12882-022-02763-1), 2022-04-28
Supplement: MOESM1 [file 20353758]

# The Effect of Renin-Angiotensin-Aldosterone System Inhibitors on Binary and Continuous Renal Outcomes in Subgroups of Patients with Diabetes: An Extensive Meta-Analysis

Supplement 1

## Table of Contents

|                                                                                                                                                                 |           |
|-----------------------------------------------------------------------------------------------------------------------------------------------------------------|-----------|
| <b>SUPP 1. TABLE 1: PRISMA CHECKLIST .....</b>                                                                                                                  | <b>2</b>  |
| <b>SUPP 1. TABLE 2: SEARCH STRATEGY IN MEDLINE .....</b>                                                                                                        | <b>4</b>  |
| <b>SUPP 1. TABLE 3: DEFINITIONS OF BINARY OUTCOMES: .....</b>                                                                                                   | <b>8</b>  |
| <b>SUPP 1. TABLE 4: THE ANALYSIS OF THE CONTINUOUS OUTCOMES USING A NUMBER OF STATISTICAL ASSUMPTIONS.....</b>                                                  | <b>9</b>  |
| <b>SUPP 1. TABLE 5: CHARACTERISTICS OF STUDY POPULATIONS IN INCLUDED RANDOMIZED CONTROLLED TRIALS .....</b>                                                     | <b>11</b> |
| <b>SUPP 1. TABLE 6: COMPARISON BETWEEN OUR AND PREVIOUS META-ANALYSES .....</b>                                                                                 | <b>13</b> |
| <b>SUPP 1. TABLE 7: INTER-RATER RELIABILITY TO ASSESS FOR THE AGREEMENT BETWEEN THE TWO REVIEWERS FOR STUDY SELECTION USING WEIGHTED KAPPA STATISTICS .....</b> | <b>15</b> |
| <b>SUPP 1. TABLE 8: STUDIES' RISK OF BIAS USING THE COCHRANE COLLABORATION'S RISK OF BIAS SCALE .....</b>                                                       | <b>16</b> |
| <b>SUPP 1. TABLE 9: REPORTED BINARY RENAL OUTCOMES IN THE INCLUDED TRIALS (33 TRIALS) .....</b>                                                                 | <b>18</b> |
| <b>SUPP 1. TABLE 10: REPORTED CONTINUOUS RENAL OUTCOMES IN THE INCLUDED TRIALS (39 TRIALS) .....</b>                                                            | <b>20</b> |

**SUPP 1. LIST 1: A LIST OF THE CITATIONS OF THE INCLUDED CLINICAL TRIALS: 46 INCLUDED RCT PRESENTED IN 50 PUBLISHED ARTICLES .....22**

**Supp 1. Table 1: PRISMA Checklist**

| Section/topic             | # | Checklist item                                                                                                                                                                                                                                                                                              | Reported on page # |
|---------------------------|---|-------------------------------------------------------------------------------------------------------------------------------------------------------------------------------------------------------------------------------------------------------------------------------------------------------------|--------------------|
| <b>TITLE</b>              |   |                                                                                                                                                                                                                                                                                                             |                    |
| Title                     | 1 | Identify the report as a systematic review, meta-analysis, or both.                                                                                                                                                                                                                                         | 1                  |
| <b>ABSTRACT</b>           |   |                                                                                                                                                                                                                                                                                                             |                    |
| Structured summary        | 2 | Provide a structured summary including, as applicable: background; objectives; data sources; study eligibility criteria, participants, and interventions; study appraisal and synthesis methods; results; limitations; conclusions and implications of key findings; systematic review registration number. | 2                  |
| <b>INTRODUCTION</b>       |   |                                                                                                                                                                                                                                                                                                             |                    |
| Rationale                 | 3 | Describe the rationale for the review in the context of what is already known.                                                                                                                                                                                                                              | 3                  |
| Objectives                | 4 | Provide an explicit statement of questions being addressed with reference to participants, interventions, comparisons, outcomes, and study design (PICOS).                                                                                                                                                  | 3                  |
| <b>METHODS</b>            |   |                                                                                                                                                                                                                                                                                                             |                    |
| Protocol and registration | 5 | Indicate if a review protocol exists, if and where it can be accessed (e.g., Web address), and, if available, provide registration information including registration number.                                                                                                                               | 3                  |
| Eligibility criteria      | 6 | Specify study characteristics (e.g., PICOS, length of follow-up) and report characteristics (e.g., years considered, language, publication status) used as criteria for eligibility, giving rationale.                                                                                                      | 4                  |
| Information sources       | 7 | Describe all information sources (e.g., databases with dates of coverage, contact with study authors to identify additional studies) in the search and date last searched.                                                                                                                                  | 4                  |
| Search                    | 8 | Present full electronic search strategy for at least one database, including any limits used, such that it could be repeated.                                                                                                                                                                               | 4                  |
| Study selection           | 9 | State the process for selecting studies (i.e., screening, eligibility, included in systematic review, and, if applicable, included in the meta-analysis).                                                                                                                                                   | 5                  |

|                                    |    |                                                                                                                                                                                                                        |   |
|------------------------------------|----|------------------------------------------------------------------------------------------------------------------------------------------------------------------------------------------------------------------------|---|
| Data collection process            | 10 | Describe method of data extraction from reports (e.g., piloted forms, independently, in duplicate) and any processes for obtaining and confirming data from investigators.                                             | 5 |
| Data items                         | 11 | List and define all variables for which data were sought (e.g., PICOS, funding sources) and any assumptions and simplifications made.                                                                                  | 5 |
| Risk of bias in individual studies | 12 | Describe methods used for assessing risk of bias of individual studies (including specification of whether this was done at the study or outcome level), and how this information is to be used in any data synthesis. | 6 |
| Summary measures                   | 13 | State the principal summary measures (e.g., risk ratio, difference in means).                                                                                                                                          | 6 |
| Synthesis of results               | 14 | Describe the methods of handling data and combining results of studies, if done, including measures of consistency (e.g., $I^2$ ) for each meta-analysis.                                                              | 6 |

Page 1 of 2

| Section/topic                 | #  | Checklist item                                                                                                                                                                                           | Report ed on page # |
|-------------------------------|----|----------------------------------------------------------------------------------------------------------------------------------------------------------------------------------------------------------|---------------------|
| Risk of bias across studies   | 15 | Specify any assessment of risk of bias that may affect the cumulative evidence (e.g., publication bias, selective reporting within studies).                                                             | 6                   |
| Additional analyses           | 16 | Describe methods of additional analyses (e.g., sensitivity or subgroup analyses, meta-regression), if done, indicating which were pre-specified.                                                         | 6                   |
| <b>RESULTS</b>                |    |                                                                                                                                                                                                          |                     |
| Study selection               | 17 | Give numbers of studies screened, assessed for eligibility, and included in the review, with reasons for exclusions at each stage, ideally with a flow diagram.                                          | 7                   |
| Study characteristics         | 18 | For each study, present characteristics for which data were extracted (e.g., study size, PICOS, follow-up period) and provide the citations.                                                             | 7                   |
| Risk of bias within studies   | 19 | Present data on risk of bias of each study and, if available, any outcome level assessment (see item 12).                                                                                                | 7                   |
| Results of individual studies | 20 | For all outcomes considered (benefits or harms), present, for each study: (a) simple summary data for each intervention group (b) effect estimates and confidence intervals, ideally with a forest plot. | 7-11                |
| Synthesis of results          | 21 | Present results of each meta-analysis done, including confidence intervals and measures of consistency.                                                                                                  | 7-11                |
| Risk of bias across studies   | 22 | Present results of any assessment of risk of bias across studies (see Item 15).                                                                                                                          | 7-11                |
| Additional analysis           | 23 | Give results of additional analyses, if done (e.g., sensitivity or subgroup analyses, meta-regression [see Item 16]).                                                                                    | 7-11                |
| <b>DISCUSSION</b>             |    |                                                                                                                                                                                                          |                     |

|                     |    |                                                                                                                                                                                      |    |
|---------------------|----|--------------------------------------------------------------------------------------------------------------------------------------------------------------------------------------|----|
| Summary of evidence | 24 | Summarize the main findings including the strength of evidence for each main outcome; consider their relevance to key groups (e.g., healthcare providers, users, and policy makers). | 11 |
| Limitations         | 25 | Discuss limitations at study and outcome level (e.g., risk of bias), and at review-level (e.g., incomplete retrieval of identified research, reporting bias).                        | 13 |
| Conclusions         | 26 | Provide a general interpretation of the results in the context of other evidence, and implications for future research.                                                              | 14 |
| <b>FUNDING</b>      |    |                                                                                                                                                                                      |    |
| Funding             | 27 | Describe sources of funding for the systematic review and other support (e.g., supply of data); role of funders for the systematic review.                                           | 1  |

From: Moher D, Liberati A, Tetzlaff J, Altman DG, The PRISMA Group (2009). Preferred Reporting Items for Systematic Reviews and Meta-Analyses: The PRISMA Statement. PLoS Med 6(7): e1000097. doi:10.1371/journal.pmed1000097

For more information, visit: [www.prisma-statement.org](http://www.prisma-statement.org).

## Supp 1. Table 2: Search Strategy in Medline

| Concepts | #        | Searches                                                                           | Results      |
|----------|----------|------------------------------------------------------------------------------------|--------------|
|          |          |                                                                                    |              |
|          |          | Database(s): <b>All Ovid MEDLINE(R)</b> 1946 to Present, searched on Jan 28 2020   |              |
|          | <b>1</b> | <b>exp Angiotensin-Converting Enzyme Inhibitors/</b>                               | <b>43109</b> |
|          | 2        | ((Angiotensin adj1 Converting Enzyme) or ACE) adj (Inhibit* or Antagonist?).tw,kw. | 34846        |

|    |    |                                                                                                                                                                                                                                                                                                                                                                                                                                                                                                                                                                                                                                                                              |       |
|----|----|------------------------------------------------------------------------------------------------------------------------------------------------------------------------------------------------------------------------------------------------------------------------------------------------------------------------------------------------------------------------------------------------------------------------------------------------------------------------------------------------------------------------------------------------------------------------------------------------------------------------------------------------------------------------------|-------|
|    | 3  | (alacepril or benazepril or benazeprilat or Captopril or ceronapril or Cilazapril or cilazaprilat or delapril or Enalapril or Enalaprilat or Fosinopril or fosinoprilat or gemopatrilat or imidapril or imidaprilat or libenzapril or Lisinopril or moexipril or omapatrilat or Perindopril or perindoprilat or Quinapril or quinaprilat or Ramipril or ramiprilat or rentiapril or sampatrilat or spirapril or temocapril hydrochloride or Teprotide or trandolapril or zofenopril or capoten or lopirin or renitec or renitek or vasotec or fosinorm or monopril or prinivil or Zestril or moexipril or Accupril or triatec or tritace or inhibace or trandolapril).tw,kw. | 26345 |
|    | 4  | exp Angiotensin Receptor Antagonists/                                                                                                                                                                                                                                                                                                                                                                                                                                                                                                                                                                                                                                        | 23177 |
|    | 5  | (Angiotensin adj2 Receptor adj1 (Antagonist? or inhibit* or blocker?)).tw,kw.                                                                                                                                                                                                                                                                                                                                                                                                                                                                                                                                                                                                | 12205 |
|    | 6  | (ARB? or sartin? or azilsartan or candesartan or candesartan or enoltasartan or eprosartan or Irbesartan or Losartan or olmesartan or saprisartan or Telmisartan or Valsartan or Fimasartan or Forasartan cozaar or aprovel or avapro or benicar or olmetec or micardis or pritor or diovan or Atacand or Edarbi or Teveten).tw,kw.                                                                                                                                                                                                                                                                                                                                          | 22789 |
| A  | 7  | 1 or 2 or 3 or 4 or 5 or 6                                                                                                                                                                                                                                                                                                                                                                                                                                                                                                                                                                                                                                                   | 80975 |
| B1 | 8  | DIABETIC NEPHROPATHIES/pc or Proteinuria/pc or Albuminuria/pc                                                                                                                                                                                                                                                                                                                                                                                                                                                                                                                                                                                                                | 3914  |
|    | 9  | DIABETIC NEPHROPATHIES/ or ((Proteinuria/ or Albuminuria/) and (exp diabetes mellitus/ or diabet*.tw,kw.))                                                                                                                                                                                                                                                                                                                                                                                                                                                                                                                                                                   | 30988 |
|    | 10 | ((diabet* or nodular or Intracapillary or Intra-capillary) adj glomerulosclerosis).tw,kw.                                                                                                                                                                                                                                                                                                                                                                                                                                                                                                                                                                                    | 733   |
|    | 11 | diabet* glomerulopath*.tw,kw.                                                                                                                                                                                                                                                                                                                                                                                                                                                                                                                                                                                                                                                | 333   |
|    | 12 | (diabetic adj (nephropath* or nephrosclerosis or kidney disease?)).tw,kw.                                                                                                                                                                                                                                                                                                                                                                                                                                                                                                                                                                                                    | 19316 |
|    | 13 | ((Proteinuria? or Albuminuria? or microalbuminuria? or macroalbuminuria? or Nephroprotectl* or Nephro-protectl* or renal loss* or kidney loss*) and diabet*).tw,kw.                                                                                                                                                                                                                                                                                                                                                                                                                                                                                                          | 16830 |

|    |    |                                                                                                                                                                                                                                                                                                                                                                                                                                                                                                      |         |
|----|----|------------------------------------------------------------------------------------------------------------------------------------------------------------------------------------------------------------------------------------------------------------------------------------------------------------------------------------------------------------------------------------------------------------------------------------------------------------------------------------------------------|---------|
|    | 14 | ((micro or macro) adj albuminaria?) and diabet*).tw,kw.                                                                                                                                                                                                                                                                                                                                                                                                                                              | 0       |
|    | 15 | (diabetic adj (nephropath* or nephrosclerosis or kidney disease?)).tw,kw.                                                                                                                                                                                                                                                                                                                                                                                                                            | 19316   |
| B2 | 16 | 9 or 10 or 11 or 12 or 13 or 14 or 15                                                                                                                                                                                                                                                                                                                                                                                                                                                                | 41965   |
|    | 17 | (KIDNEY FAILURE, CHRONIC/ or RENAL INSUFFICIENCY, CHRONIC/ or GLOMERULAR FILTRATION RATE/) and (Diabetes Mellitus, Type 1/ or Diabetes Mellitus, Type 2/ or diabet*.tw,kw.)                                                                                                                                                                                                                                                                                                                          | 19383   |
|    | 18 | ((((chronic or end) adj1 stage adj1 (renal or kidney) adj1 (disease? or insufficienc* or failure? or impairment? or dysfunction?)) or (ren* adj1 (outcome or endpoint or protec*)) or renoprotec* or nephropath* or CKD or ESRD) and (Diabet* or hyperglycemi* or glycemi*)).tw,kw.                                                                                                                                                                                                                  | 36217   |
|    | 19 | ((endstage adj1 (renal or kidney) adj1 (disease? or insufficienc* or failure? or impairment? or dysfunction?)) and (Diabet* or hyperglycemi* or glycemi*)).tw,kw.                                                                                                                                                                                                                                                                                                                                    | 112     |
| B3 | 20 | 17 or 18 or 19                                                                                                                                                                                                                                                                                                                                                                                                                                                                                       | 44447   |
|    | 21 | exp RANDOMIZED CONTROLLED TRIAL/                                                                                                                                                                                                                                                                                                                                                                                                                                                                     | 500128  |
|    | 22 | (Randomized Controlled Trial or Controlled Clinical Trial or Pragmatic Clinical Trial or Equivalence Trial or Clinical Trial, Phase III).pt.                                                                                                                                                                                                                                                                                                                                                         | 591222  |
|    | 23 | Randomized Controlled Trial/ or exp Randomized Controlled Trials as Topic/ or "Randomized Controlled Trial (topic)"/ or Controlled Clinical Trial/ or exp Controlled Clinical Trials as Topic/ or "Controlled Clinical Trial (topic)"/ or Randomization/ or Random Allocation/ or Double-Blind Method/ or Double Blind Procedure/ or Double-Blind Studies/ or Single-Blind Method/ or Single Blind Procedure/ or Single-Blind Studies/ or Placebos/ or Placebo/ or Control Groups/ or Control Group/ | 827481  |
|    | 24 | (random* or sham or placebo*).ti,ab,hw,kf,kw.                                                                                                                                                                                                                                                                                                                                                                                                                                                        | 1433944 |
|    | 25 | ((singl* or doubl*) adj (blind* or dumm* or mask*)).ti,ab,hw,kf,kw.                                                                                                                                                                                                                                                                                                                                                                                                                                  | 230001  |
|    | 26 | ((tripl* or trebl*) adj (blind* or dumm* or mask*)).ti,ab,hw,kf,kw.                                                                                                                                                                                                                                                                                                                                                                                                                                  | 912     |

|                                                  |    |                                                                                                                       |         |
|--------------------------------------------------|----|-----------------------------------------------------------------------------------------------------------------------|---------|
|                                                  | 27 | (control* adj3 (study or studies or trial* or group*)).ti,ab,kf,kw.                                                   | 934605  |
|                                                  | 28 | (Nonrandom* or non random* or non-random* or quasi-random* or quasirandom*).ti,ab,hw,kf,kw.                           | 41825   |
|                                                  | 29 | allocated.ti,ab,hw.                                                                                                   | 62215   |
|                                                  | 30 | ((open label or open-label) adj5 (study or studies or trial*)).ti,ab,hw,kf,kw.                                        | 32660   |
|                                                  | 31 | ((equivalence or superiority or non-inferiority or noninferiority) adj3 (study or studies or trial*)).ti,ab,hw,kf,kw. | 7559    |
|                                                  | 32 | (pragmatic study or pragmatic studies).ti,ab,hw,kf,kw.                                                                | 362     |
|                                                  | 33 | ((pragmatic or practical) adj3 trial*).ti,ab,hw,kf,kw.                                                                | 4606    |
|                                                  | 34 | ((quasiexperimental or quasi-experimental) adj3 (study or studies or trial*)).ti,ab,hw,kf,kw.                         | 1510    |
|                                                  | 35 | (phase adj3 (III or "3") adj3 (study or studies or trial*)).ti,hw,kf,kw.                                              | 26990   |
| C                                                | 36 | 21 or 22 or 23 or 24 or 25 or 26 or 27 or 28 or 29 or 30 or 31 or 32 or 33 or 34 or 35                                | 2061009 |
| A AND<br>B1 AND<br>C,                            | 37 | 7 and 8 and 36                                                                                                        | 461     |
| (A AND<br>(B2 OR<br>B3) AND<br>C) Not<br>1st set | 38 | (7 and (16 or 20) and 36) not 37                                                                                      | 1638    |
| 1st set in<br>last 10<br>yrs                     | 39 | limit 37 to yr="2010 -Current"                                                                                        | 127     |
| 2nd set<br>in last 10<br>yrs                     | 40 | limit 38 to yr="2010 -Current"                                                                                        | 568     |

**Supp 1. Table 3: Definitions of primary and secondary outcomes:**

| Outcome                      | Definition                                                                                                                                                                                                                                                                                                                                                                                                                                                                  |
|------------------------------|-----------------------------------------------------------------------------------------------------------------------------------------------------------------------------------------------------------------------------------------------------------------------------------------------------------------------------------------------------------------------------------------------------------------------------------------------------------------------------|
| <b>Primary Outcomes</b>      |                                                                                                                                                                                                                                                                                                                                                                                                                                                                             |
| Kidney failure               | The chronic need to renal replacement therapy/dialysis or the need for kidney transplant                                                                                                                                                                                                                                                                                                                                                                                    |
| Doubling of serum creatinine | The doubling of serum creatinine value from its baseline value that was measured at the start of the trial                                                                                                                                                                                                                                                                                                                                                                  |
| Regression of albuminuria    | The improvement and change of albuminuria from a higher category of albuminuria at baseline to a lower category                                                                                                                                                                                                                                                                                                                                                             |
| Glomerular filtration rate   | The measure of the flow rate of filtered fluid through the kidney glomerular capillaries per unit time to estimate the kidney function and determines the stage of kidney disease. It is calculated using Cockcroft-Gault formula, The Modification of Diet in Renal Disease (MDRD) Study equation and the Chronic Kidney Disease Epidemiology Collaboration (CKD-EPI) equation. Glomerular filtration rate depends on blood creatinine level, age, body weight and gender. |
| Serum creatinine levels      | A measure of creatinine levels in the blood, that helps in determining kidney function and the stage of kidney disease.                                                                                                                                                                                                                                                                                                                                                     |
| Albuminuria levels           | It is the measurement of albumin in urine that helps determine the level of diabetic nephropathy, as follows: A1 (normoalbuminuria) <30mg/g; A2 (microalbuminuria) 30-300 mg/g; A3 (macroalbuminuria) >300 mg/g.                                                                                                                                                                                                                                                            |
| <b>Secondary Outcomes</b>    |                                                                                                                                                                                                                                                                                                                                                                                                                                                                             |



|                                       |                                                                                                                                                                                                                                                                                                                            |
|---------------------------------------|----------------------------------------------------------------------------------------------------------------------------------------------------------------------------------------------------------------------------------------------------------------------------------------------------------------------------|
| All-cause mortality                   | The total number of deaths from all causes for the study population during the study time period.                                                                                                                                                                                                                          |
| Need for additional antihypertensives | The number of patients that failed to achieve the target blood pressure within the specified time period according to the clinical trial protocol, and therefore they require to receive an additional antihypertensive medication other than the trial's randomized intervention(s) to achieve the target blood pressure. |
| Cases with disruptive cough           | The number of patients who developed a disruptive cough that had started after the commencement of the trial, and which could not be associated with a specific diagnosis.                                                                                                                                                 |

### Supp 1. Table 4: The analysis of the continuous outcomes using a number of statistical assumptions

|                                                                                                                                                                                                                                                                                                                                                                                                                                                                                                                                                                                                                                                                                                                                                                                   |
|-----------------------------------------------------------------------------------------------------------------------------------------------------------------------------------------------------------------------------------------------------------------------------------------------------------------------------------------------------------------------------------------------------------------------------------------------------------------------------------------------------------------------------------------------------------------------------------------------------------------------------------------------------------------------------------------------------------------------------------------------------------------------------------|
| <ul style="list-style-type: none"> <li>• <b>Description of statistical analysis for continuous outcomes</b> <ul style="list-style-type: none"> <li>• We considered the difference of change from baseline between the arms of the study as the effect size for our meta analysis except for Alb24h/AER : the mean difference between the change from baseline in the intervention group and the change from baseline in the control group (placebo or other anti-HTN drugs).</li> <li>• For GFR, in addition to the mean difference of the change from baseline, we considered the difference in the annual rate of decline between the arms of the study.</li> <li>• For Alb24h/AER outcome, we used the standardized mean difference as our effect size.</li> </ul> </li> </ul> |
|-----------------------------------------------------------------------------------------------------------------------------------------------------------------------------------------------------------------------------------------------------------------------------------------------------------------------------------------------------------------------------------------------------------------------------------------------------------------------------------------------------------------------------------------------------------------------------------------------------------------------------------------------------------------------------------------------------------------------------------------------------------------------------------|

- If the study includes two arms in the same category, we combined the data for the two arms (ex: two arms ACEi/ARB or two arms Other Anti-HTN);
  - $Mean = (n1 * mean1 + n2 * mean2) / (n1 + n2)$
  - $SD = \sqrt{[(n1-1)var1 + (n2-1) * var2 / (n1+n2-2)]}$
- If the study reported data by subgroup, we combined the results of subgroups (ex: data presented by hypertension status);
- If the study reported the change from baseline for each arm and its SD, we considered these data directly into the calculation of the effect size
- If the study reported data at baseline and at the end of the study, we calculated the change from baseline and its SD;
  - Mean difference = Mean post – Mean pre; for each arm in the study
  - $SD = \sqrt{[(SDpre)^2 + (SDpost)^2 - 2 \times corr(pre, post) \times SDpre \times SDpost]}$
- We have considered a conservative estimate for the correlation coefficient:  $corr(pre, post) = 0.4$  (Cochrane and Shuyan 2015).
- If the mean at baseline or at the end of the study is missing and the change from baseline is not reported and could not be inferred from the study results, we excluded the study from the comparison (eg. Lewis 2001 for AER).
- We used random-effects meta-analysis for all outcomes and subgroup analysis.
- Publication bias was assessed with visual inspection of funnel plots.
- We tested Heterogeneity using chi-square and  $I^2$  tests with a significance level of 0.05 for the chi-square test.
- We have done a sensitivity analysis by excluding the outlier studies from the meta analysis.
- We conducted different subgroup analysis (eg. type of diabetes, year of publication...).

• **Estimation of missing SDs**

- If we have SD missing and confidence intervals we estimate SD using the formula  $SD = (UCL - LCL) / 3.92$ .
- If we have SD missing and confidence interval using SEM, we use the following formula  $racine(n) * (UCL - LCL) / 3.92$ ;
- If we have the median and IQR we use the formula  $IQR / 1.35$ .
- If we have the median and the range, we calculated the SD by dividing the range by 4 if  $n < 70$  and by 6 if not.
- If we have SD at the end of the study missing, then we consider it equal to SD baseline.

• **Converting the geometric mean to the arithmetic mean**

- This is the case for some studies reporting GFR, ALB24h and AER as geometric mean.
- We transformed the geometric mean and its antilog or confidence intervals to log transformed data.
- We used Higgings formulas (Higgings 2008, method 1) to calculate the arithmetic means and their SDs.

• **Calculation of the annual rate of decline**

- If the study reported the annual rate of decline, we used it directly.
- If the study reported a monthly decline, we calculate the annual decline by multiplying it by 12.



| Study, Year      | Total sample size | Male (%) | Mean age (years) | Type1 Diabetes (n) | Type2 Diabetes (n) | Hypertension (%) | CVD (%) | Albuminuria (n) |       |       | Race (n) |       |          |       |        | Smoking status |        |       |
|------------------|-------------------|----------|------------------|--------------------|--------------------|------------------|---------|-----------------|-------|-------|----------|-------|----------|-------|--------|----------------|--------|-------|
|                  |                   |          |                  |                    |                    |                  |         | Normo           | Micro | Macro | White    | Black | Hispanic | Asian | O ther | Current        | Former | Never |
| Muirhead 1999    | 91                | 74%      | 57.1             | 0                  | 91                 | 41%              |         | 0               | 91    | 0     | 83       | 1     | 0        | 3     |        |                |        |       |
| HOPE 2000        | 3577              | 63%      | 60.5             | 81                 | 3496               | 56%              | 69%     | 2437            | 1140  | 0     |          |       |          |       |        | 544            |        |       |
| O'Hare 2000      | 134               | 48%      | 46.3             | 134                | 0                  | 0%               | 0%      | 0               | 134   | 0     |          |       |          |       |        |                |        |       |
| Schrier 2000     | 470               | 67%      | 59.8             | 0                  | 470                | 100%             | 51%     |                 |       | 82    |          |       |          |       |        |                |        |       |
| Tarnow 2000      | 48                | 67%      | 53               | 0                  | 50                 | 100%             |         | 0               | 0     | 50    | 50       | 0     | 0        | 0     |        | 27             |        |       |
| Lewis 2001       | 1715              | 66%      | 49.4             | 0                  | 1715               | 100%             | 29%     | 0               | 0     | 1715  | 1242     | 228   | 83       | 85    |        |                |        |       |
| Baines 2001      | 54                | 63%      | 31.1             | 54                 | 0                  | 0%               | 0%      | 0               |       |       |          |       |          |       |        | 22             |        |       |
| Bojestig 2001    | 55                | 75%      | 38               | 55                 | 0                  | 0%               | 0%      | 0               | 55    | 0     |          |       |          |       |        |                |        |       |
| Brenner 2001     | 1513              | 63%      | 49.1             | 0                  | 1513               | 96%              | 21%     | 0               | 0     | 1513  | 736      | 230   | 276      | 252   |        | 277            |        |       |
| Parving 2001     | 590               | 68%      | 57.2             | 0                  | 590                | 100%             | 27%     | 0               | 590   | 0     | 574      |       |          |       |        | 110            | 223    | 257   |
| Kvetny 2001      | 89                | 30%      | 51               | 89                 | 0                  | 0%               | 0%      | 89              | 0     | 0     |          |       |          |       |        |                |        |       |
| Baba 2001        | 436               | 50%      | 62.6             | 0                  | 436                | 100%             |         | 159             | 159   | 0     | 0        | 0     | 0        | 436   |        | 72             |        |       |
| Katayama 2002    | 81                | 35%      | 31.8             | 79                 | 3                  | 17%              | 0%      |                 |       |       | 0        | 0     | 0        | 79    |        |                |        |       |
| Fogari 2002      | 309               | 57%      | 55.6             | 0                  | 309                | 100%             | 0%      | 0               | 309   | 0     |          |       |          |       |        |                |        |       |
| Schrier 2002     | 480               | 55%      | 60               | 0                  | 480                | 0%               | 24%     | 317             | 111   | 52    | 350      | 34    | 82       |       |        | 62             | 220    | 198   |
| Ahmad 2003       | 85                | 45%      | 28.7             | 73                 | 12                 | 0%               | 0%      | 0               | 73    | 0     |          |       |          | 72    |        |                |        |       |
| Marre 2004       | 570               | 23%      | 57.6             | 0                  | 569                | 100%             |         | 0               | 569   | 0     |          |       |          |       |        | 28             | 46     | 126   |
| Jerums 2004      | 77                | 64%      | 54.7             | 0                  | 77                 | 0%               | 0%      | 0               | 77    | 0     |          |       |          |       |        | 24             |        |       |
| Ruggenenti 2004  | 904               | 70%      | 82.5             | 0                  | 1204               | 133%             |         | 1204            | 0     | 0     |          |       |          |       |        | 144            | 362    | 698   |
| DallaVestra 2004 | 180               | 73%      | 62               | 0                  | 180                | 100%             | 4%      | 0               | 180   | 0     |          |       |          |       |        |                |        |       |
| Fogari 2005      | 121               | 49%      | 51.1             | 0                  | 121                | 100%             |         | 0               | 121   | 0     |          |       |          |       |        | 0              |        |       |
| Ogawa 2007       | 92                | 47%      | 61.5             | 0                  | 92                 | 100%             |         | 0               | 92    | 0     | 0        | 0     | 0        | 92    |        |                |        |       |
| Makino 2007      | 514               | 73%      | 60               | 0                  | 514                | 68%              | 0%      | 0               | 514   | 0     | 0        | 0     | 0        | 514   | 0      | 0              | 0      | 0     |
| Bilous 2009      | 5231              | 54%      | 36.3             | 3326               | 1905               | 23%              |         | 5231            | 0     | 0     | 5076     |       |          |       |        | 1145           | 492    | 3594  |
| Mauer 2009       | 285               | 15%      | 38.8             | 285                | 0                  | 0%               |         | 285             | 0     | 0     | 279      | 0     | 0        | 0     |        |                |        |       |

| Study, Year     | Total sample size | Male (%) | Mean age (years) | Type1 Diabetes (n) | Type2 Diabetes (n) | Hypertension (%) | CVD (%) | Albuminuria (n) |       |       | Race (n) |       |          |       |       | Smoking status |        |       |
|-----------------|-------------------|----------|------------------|--------------------|--------------------|------------------|---------|-----------------|-------|-------|----------|-------|----------|-------|-------|----------------|--------|-------|
|                 |                   |          |                  |                    |                    |                  |         | Normo           | Micro | Macro | White    | Black | Hispanic | Asian | Other | Current        | Former | Never |
| Haller 2011     | 4447              | 46%      | 53.9             | 0                  | 4447               |                  | 33%     | 4447            | 0     | 0     | 4447     | 0     | 0        | 0     |       | 832            | 905    | 2708  |
| Ruggenenti 2011 | 380               | 65%      | 60.2             | 0                  | 380                | 100%             |         | 328             | 52    | 0     |          |       |          |       |       | 49             | 150    | 181   |
| Weil 2013       | 169               | 29%      | 52.3             | 0                  | 169                | 12%              | 0%      | 91              | 78    | 0     | 0        | 0     | 0        | 0     | 0     | 0              | 0      | 0     |
| Fuchs 2016      | 655               | 51%      | 52               | 0                  | 655                | 100%             |         |                 |       |       | 403      | 252   | 0        | 0     |       | 48             | 310    | 208   |

### Supp 1. Table 6: Comparison between Our and Previous Meta-analyses

|                    | Our MA                                                                                                                                                                                                      | Lopez 2016                                                                                                                                                                                                              | Wu 2013                                                                                                                                                                                                                    | Vejakama 2012                                                                                                                                                  | Casas 2005                                                                                                                                                                                              | Palmer 2015                                                                                                                                                                                                                                                   | Coleman 2019                                                                                                                                                                                                            |
|--------------------|-------------------------------------------------------------------------------------------------------------------------------------------------------------------------------------------------------------|-------------------------------------------------------------------------------------------------------------------------------------------------------------------------------------------------------------------------|----------------------------------------------------------------------------------------------------------------------------------------------------------------------------------------------------------------------------|----------------------------------------------------------------------------------------------------------------------------------------------------------------|---------------------------------------------------------------------------------------------------------------------------------------------------------------------------------------------------------|---------------------------------------------------------------------------------------------------------------------------------------------------------------------------------------------------------------------------------------------------------------|-------------------------------------------------------------------------------------------------------------------------------------------------------------------------------------------------------------------------|
| Inclusion criteria | MA of 46 RCTs that recruited more than 50 adults participants comparing the renal effects of RAASI vs placebo or other classes of active Treatment in patients with diabetes, with a follow-up >= 12 months | Network MA of 71 RCT comparing the renal and CVD effects single or combination of RAASI vs placebo or other classes of active Treatment in patients with diabetes, better than=18 years, with a follow-up >= 12 months. | Network MA of 63 RCTs comparing the effects of any single or combination of antihypertensive drugs with placebo or other classes of active treatments in patients with diabetes >=18 years, with a follow-up >= 12 months. | Network MA of 28 RCT comparing the effects of RAASI vs placebo or other classes of active treatment in patients with T2DM, >=18 years. of any study duration . | MA of 127 RCTs comparing the effects of any single or combination of antihypertensive drugs with placebo or vs active treatment in patients with diabetes or no diabetes with a follow-up >= 12 months. | Network MA of 188 RCTs comparing the effects of single or combination of antihypertensives with placebo or other classes of active treatments in patients with diabetes >=18 who had diabetes and CKD , of any study duration . excluded patients with no CKD | MA of 17 RCT comparing the effects of RAASI vs placebo on top of other antiHTN treatment, or vs other active treatment in patients with T2DM, with micro or macroalbuminuria >=18 years, with a follow-up >= 12 months. |

|                                         |                                                                              |                                                                                                                            |                                                                                                                      |                                                                               |                                                                                                                                                          |                                                                                                                           |                                                                                                                                                                    |
|-----------------------------------------|------------------------------------------------------------------------------|----------------------------------------------------------------------------------------------------------------------------|----------------------------------------------------------------------------------------------------------------------|-------------------------------------------------------------------------------|----------------------------------------------------------------------------------------------------------------------------------------------------------|---------------------------------------------------------------------------------------------------------------------------|--------------------------------------------------------------------------------------------------------------------------------------------------------------------|
| Kidney failure (vs. placebo)            | RAASi better than placebo*<br><br>OR 0.74 (95%CI 0.56 - 0.97)*               | RAASi better than placebo *<br><br>ACE inhibitors: OR 0.68 (95%CI 0.51 – 0.91)*<br><br>ARBs: OR 0.74 (95% CI 0.57 – 0.97)* | RAASi better than placebo<br><br>ACE inhibitor: OR 0.71 (95%CI 0.39 - 1.28)<br><br>ARBs: OR 0.73 (95%CI 0.43 - 1.25) | RAASi better than placebo*<br><br>RR 0.80 (95%CI 0.69 - 0.93)                 | -                                                                                                                                                        | ARB better than placebo*<br>OR 0.81 (95%CI 0.69–0.96)<br><br>ACE inhibitor: better than placebo<br>0.73 (95%CI 0.47–1.14) | RAASi better than control (placebo and active)*<br><br>RR 0.79 (0.75 – 0.83)<br><br>ACE inhibitor: RR 0.92 (95%CI 0.84 – 0.99)*<br>ARB: RR 0.78 (95%CI 0.71–0.86)* |
| Kidney failure (vs. active treatment)   | RAASi is not better than active treatment<br><br>0.71 (95%CI 0.40 - 1.28)    | -                                                                                                                          | -                                                                                                                    | RAASi is not better than active treatment<br><br>RR 0.82 [95% CI 0.64 - 1.05] | RAASi is not better than active treatment in DM patients<br><br>DM and no DM: RR 0.87 (95%CI 0.75–0.99) *<br>DM patients only: RR 0.89 (95%CI 0.74–1.07) | -                                                                                                                         |                                                                                                                                                                    |
| Doubling of SrCr (vs. placebo)          | RAASi better than placebo *<br><br>OR 0.71 (95%CI 0.55 - 0.91)*              | RAASi better than placebo *<br>ACE inhibitors<br>OR 0.70 (95% CrI 0.52–0.91)*                                              | ACE better than placebo*<br><br>ACE inhibitors: OR 0.58 (95%CI 0.32 - 0.90)*                                         | RAASi better than placebo *<br><br>RR 0.76 (95%CI 0.69 - 0.84)*               | -                                                                                                                                                        | -                                                                                                                         | RAASi better than control (placebo and active)<br><br>RR 0.77 (95%CI 0.50 – 1.21)                                                                                  |
| Doubling of SrCr (vs. active treatment) | RAASi is not better than active treatment<br><br>OR 0.54 (95%CI 0.26 - 1.12) | -                                                                                                                          | -                                                                                                                    | RAASi is better than active treatment *<br><br>RR 0.66 (95%CI 0.53 - 0.83)    | RAASi is not better than active treatment<br><br>DM patients only: RR 1.09 (95%CI 0.55–2.15)                                                             | -                                                                                                                         | ACE inhibitor: RR 0.62 (95%CI 0.05 – 7.65)<br><br>ARB: RR 0.77 (95%CI 0.59 – 1.01)                                                                                 |

|                                         |                                                                              |   |   |                                                                        |                                                    |   |                                                                                                                  |
|-----------------------------------------|------------------------------------------------------------------------------|---|---|------------------------------------------------------------------------|----------------------------------------------------|---|------------------------------------------------------------------------------------------------------------------|
|                                         |                                                                              |   |   |                                                                        | DM and no DM:<br>RR 0.71<br>(95% CI 0.49–<br>1.04) |   |                                                                                                                  |
| Regression of albuminuria (vs. placebo) | RAASi is better than placebo<br><br>OR 3.00 (95%CI 0.96 - 9.37)              | - | - | RAASi better than placebo<br><br>RR 1.17 (1.00 - 1.37)                 | -                                                  | - | RAASi is not better than control (placebo and active)                                                            |
| Regression of albuminuria (vs. active)  | RAASi is not better than active treatment<br><br>OR 1.43 (95%CI 0.91 - 2.25) | - | - | RAASi is not better than active treatment<br><br>RR 1.16 (0.99 - 1.39) | -                                                  | - | RR 1.55 (95%CI 0.93–2.58)<br><br>ACE inhibitor: RR 1.27 (95%CI 0.98–1.71)<br><br>ARB: RR 4.10 (95%CI 0.01– >100) |

**Supp 1. Table 7: Inter-rater reliability to assess for the agreement between the two reviewers for study selection using weighted kappa statistics**

| Reviewer A | Reviewer B | A Yes, B Yes | A Yes, B No | A No, B Yes | A No, B No | Proportionate Agreement | Yes Probability | No Probability | Random Agreement Probability | Cohen's Kappa |
|------------|------------|--------------|-------------|-------------|------------|-------------------------|-----------------|----------------|------------------------------|---------------|
| ML         | NA         | 87           | 45          | 72          | 2305       | 0.95337                 | 0.00333         | 0.88735        | 0.89069                      | 0.57341       |

**Supp 1. Table 8: Studies' risk of bias using the Cochrane Collaboration's risk of bias scale**

| TRIAL/BIAS                                      | Random sequence generation (selection bias) | Allocation concealment (selection bias) | Blinding of participants and personnel (performance bias) | Blinding of outcome assessment (detection bias) | Incomplete outcome data (attrition bias) | Selective reporting (reporting bias) | Funding |
|-------------------------------------------------|---------------------------------------------|-----------------------------------------|-----------------------------------------------------------|-------------------------------------------------|------------------------------------------|--------------------------------------|---------|
| Melbourne Diabetic Nephropathy Study Group 1991 | L                                           | L                                       | H                                                         | H                                               | U                                        | U                                    | H       |
| Chan 1992                                       | L                                           | U                                       | L                                                         | L                                               | L                                        | L                                    | H       |
| Lacourciere 1993                                | H                                           | U                                       | L                                                         | U                                               | L                                        | L                                    | U       |
| Lewis 1993                                      | U                                           | U                                       | L                                                         | L                                               | L                                        | U                                    | U       |
| Ravid 1993 & Ravid 1995                         | U                                           | U                                       | L                                                         | L                                               | L                                        | U                                    | L       |
| Lebovitz 1994                                   | U                                           | U                                       | L                                                         | L                                               | H                                        | U                                    | H       |
| Viberti 1994                                    | L                                           | U                                       | L                                                         | L                                               | L                                        | H                                    | H       |
| Agardh 1996                                     | L                                           | U                                       | L                                                         | L                                               | H                                        | H                                    | U       |
| Bakris 1996                                     | U                                           | U                                       | H                                                         | H                                               | L                                        | L                                    | L       |
| Schnack 1996                                    | L                                           | U                                       | H                                                         | H                                               | H                                        | H                                    | U       |
| Ahmad 1997                                      | U                                           | U                                       | H                                                         | H                                               | H                                        | L                                    | L       |
| Chaturvedi 1997 EUCLID Study.                   | L                                           | L                                       | L                                                         | L                                               | L                                        | L                                    | H       |
| Fogari 1997                                     | U                                           | U                                       | L                                                         | L                                               | L                                        | U                                    | U       |
| Crepaldi 1998                                   | L                                           | L                                       | L                                                         | U                                               | L                                        | L                                    | H       |
| Ravid 1998                                      | L                                           | L                                       | L                                                         | L                                               | L                                        | U                                    | L       |
| UKPDS 1998                                      | H                                           | L                                       | U                                                         | H                                               | H                                        | L                                    | H       |
| Fogari 1999                                     | U                                           | U                                       | H                                                         | H                                               | L                                        | L                                    | U       |
| Muirhead 1999                                   | U                                           | U                                       | L                                                         | L                                               | L                                        | U                                    | H       |



|                                    |   |   |   |   |   |   |   |
|------------------------------------|---|---|---|---|---|---|---|
| Fogari 2000                        | U | U | U | U | L | L | U |
| HOPE 2000                          | L | L | L | L | L | L | H |
| O'Hare 2000 (The ATLANTIS Study)   | L | L | U | U | L | L | H |
| Schrier 2000 (ABCD trial.)         | U | U | L | L | H | H | U |
| Tarnow 2000                        | U | L | U | U | L | L | H |
| Lewis 2001 (IDNT trial)            | U | L | L | L | H | H | H |
| Baines 2001 (ESPRIT trial)         | L | L | L | L | H | H | H |
| Bojestig 2001                      | U | U | L | U | L | L | H |
| Brenner 2001 (RENAAL trial)        | L | U | U | L | L | H | H |
| Parving 2001 (IRMA2 trial)         | U | U | L | L | H | H | H |
| <u>Kvetny 2001</u>                 | U | U | L | L | H | H | H |
| Baba 2001 (J-MIND study)           | L | L | H | H | U | U | U |
| Katayama 2002 (JAPAN-IDDM)         | U | L | L | L | L | L | L |
| Fogari 2002                        | L | L | H | H | L | L | U |
| Schrier 2002                       | L | L | L | L | L | L | H |
| Ahmad 2003                         | U | L | L | L | U | H | U |
| Marre 2004 (NESTOR Trial)          | U | U | L | L | L | L | H |
| Jerums 2004                        | L | L | L | H | L | L | H |
| Ruggenti 2004 (The Benedict trial) | U | U | L | L | L | L | H |
| DallaVestra 2004                   | U | U | L | L | L | L | U |
| Fogari 2005                        | L | L | H | H | L | L | L |

|                                     |   |   |   |   |   |   |   |
|-------------------------------------|---|---|---|---|---|---|---|
| Ogawa 2007                          | U | U | L | H | L | U | U |
| Makino 2008                         | H | U | L | L | H | L | H |
| Bilous 2009                         | L | L | L | L | L | H | H |
| Mauer 2009 (RAAS trial)             | L | U | L | L | L | L | H |
| Haller 2011 (Roadmap trial)         | L | L | L | L | L | L | H |
| Ruggenti 2011 (he DEMAND trial)     | L | L | L | L | L | L | H |
| Weil 2013                           | L | U | L | L | L | L | H |
| Fuchs 2016 (PREVER-treatment trial) | L | L | L | L | L | L | L |

Abbreviations: L: Low risk of bias, U: Unclear risk of bias, H: High risk of bias

### Supp 1. Table 9: Reported binary renal outcomes in the included trials (33 trials)

| Trial Name       | incidence of kidney failure | Incidence of doubling serum creatinine | Regression of albuminuria cases | All-cause mortality |
|------------------|-----------------------------|----------------------------------------|---------------------------------|---------------------|
| Chan 1992        |                             |                                        |                                 | reported            |
| Lacourciere 1993 |                             |                                        | reported                        | reported            |
| Lewis 1993       | reported                    | reported                               |                                 | reported            |
| Ravid 1993       |                             |                                        | reported                        |                     |
| Viberti 1994     |                             |                                        |                                 | reported            |
| Agardh 1996      |                             |                                        | reported                        |                     |
| Bakris 1996      | reported                    | reported                               |                                 | reported            |

|                                      |          |          |          |          |
|--------------------------------------|----------|----------|----------|----------|
| Fogari 1997                          |          |          | reported |          |
| Crepaldi 1998                        |          |          | reported |          |
| Ravid 1998                           |          |          |          | reported |
| UKPDS 1998                           | reported |          |          | reported |
| HOPE 2000                            | reported |          |          | reported |
| O'Hare 2000 (The ATLANTIS Study)     |          |          | reported |          |
| Tarnow 2000                          | reported |          |          | reported |
| Lewis 2001 (IDNT trial)              | reported | reported |          | reported |
| Brenner 2001 (RENAAL trial)          | reported | reported |          | reported |
| Parving 2001 (IRMA2 trial)           |          |          | reported | reported |
| Baba 2001 (J-MIND study)             |          |          | reported |          |
| Katayama 2002 (JAPAN-IDDM)           |          | reported |          |          |
| Fogari 2002                          |          |          | reported | reported |
| Schrier 2002                         |          |          |          | reported |
| Marre 2004 (NESTOR Trial)            |          |          | reported | reported |
| Jerumes 2004                         |          |          | reported |          |
| Ruggenenti 2004 (The Benedict trial) |          |          |          | reported |
| DallaVestra 2004                     |          |          | reported | reported |
| Fogari 2005                          |          |          | reported |          |
| Ogawa 2007                           |          |          | reported |          |
| Makino 2008 (INNOVATION trial)       |          |          | reported |          |
| Bilous 2009 (DIRECT Trials)          |          |          |          | reported |

|                                   |          |          |          |          |
|-----------------------------------|----------|----------|----------|----------|
| Mauer 2009 (RAAS trial)           |          |          | reported | reported |
| Haller 2011 (Roadmap trial)       | reported | reported |          | reported |
| Ruggenenti 2011 (he DEMAND trial) |          |          |          | reported |
| Weil 2013                         |          |          |          | reported |

**Supp 1. Table 10: Reported Continuous Renal Outcomes in the Included Trials (39 trials)**

| <b>Trial Name</b>                               | <b>Serum creatinine level (umol/L)</b> | <b>Creatinine clearance OR GFR (ml/min)</b> | <b>Albuminuria level in 24 hrs sample (24hr UAE) mg/24hr</b> | <b>Albumin excretion rate AER or UAER (mcg/min)</b> |
|-------------------------------------------------|----------------------------------------|---------------------------------------------|--------------------------------------------------------------|-----------------------------------------------------|
| Melbourne Diabetic Nephropathy Study Group 1991 |                                        | reported                                    |                                                              | reported                                            |
| Chan 1992                                       | reported                               | reported                                    | reported                                                     |                                                     |
| Lacourciere 1993                                | reported                               | reported                                    |                                                              | reported                                            |
| Ravid 1993 & Ravid 1995                         | reported                               |                                             | reported                                                     |                                                     |
| Lebovitz 1994                                   | reported                               | reported                                    | reported                                                     |                                                     |
| Viberti 1994                                    |                                        |                                             |                                                              | reported                                            |
| Agardh 1996                                     | reported                               | reported                                    |                                                              | reported                                            |
| Bakris 1996                                     |                                        | reported                                    | reported                                                     |                                                     |
| Schnack 1996                                    |                                        | reported                                    |                                                              |                                                     |

|                                  |          |          |          |          |
|----------------------------------|----------|----------|----------|----------|
| Ahmad 1997                       |          | reported |          | reported |
| Chaturvedi 1997 EUCLID Study.    |          |          |          | reported |
| Fogari 1997                      |          | reported | reported |          |
| Crepaldi 1998                    | reported | reported |          | reported |
| Ravid 1998                       |          | reported | reported |          |
| Fogari 1999                      | reported | reported | reported |          |
| Muirhead 1999                    |          | reported |          | reported |
| O'Hare 2000 (The ATLANTIS Study) |          | reported |          | reported |
| Schrier 2000 (ABCD trial.)       |          | reported |          | reported |
| Tarnow 2000                      | reported | reported | reported |          |
| Lewis 2001 (IDNT trial)          | reported |          | reported |          |
| Baines 2001 (ESPRIT trial)       |          | reported |          | reported |
| Bojestig 2001                    |          | reported |          | reported |
| Brenner 2001 (RENAAL trial)      | reported | reported |          |          |
| Parving 2001 (IRMA2 trial)       |          | reported |          | reported |
| <u>Kvetny 2001</u>               |          | reported |          |          |
| Baba 2001 (J-MIND study)         | reported |          |          | reported |
| Katayama 2002 (JAPAN-IDDM)       |          |          | reported |          |
| Fogari 2002                      |          | reported | reported |          |
| Schrier 2002                     |          |          | reported |          |
| Ahmad 2003                       |          |          | reported |          |
| Marre 2004 (NESTOR Trial)        |          | reported |          | reported |
| Jerumes 2004                     |          | reported |          | reported |

|                                     |  |          |          |          |
|-------------------------------------|--|----------|----------|----------|
| DallaVestra 2004                    |  |          |          | reported |
| Fogari 2005                         |  | reported | reported |          |
| Bilous 2009 (DIRECT Trials)         |  |          |          | reported |
| Mauer 2009 (RAAS trial)             |  | reported |          | reported |
| Haller 2011 (Roadmap trial)         |  | reported |          |          |
| Ruggenenti 2011 (he DEMAND trial)   |  | reported |          |          |
| Evans 2012 (subgroup of Lewis 2001) |  | reported |          |          |

### Supp 1. List 1: A list of the citations of the included clinical trials: 46 included RCT presented in 50 published articles

1. Melbourne Diabetic Nephropathy Study Group. Comparison between perindopril and nifedipine in hypertensive and normotensive diabetic patients with microalbuminuria. *BMJ*. 1991;302(6770):210-6.
2. Chan J, Cockram C, Nicholls M, Cheung C, Swaminathan R. Comparison of enalapril and nifedipine in treating non-insulin dependent diabetes associated with hypertension: one year analysis. *BMJ*. 1992;305(6860):981-5.
3. Lacourciere Y, Nadeau A, Poirier L, Tancrede G. Captopril or conventional therapy in hypertensive type II diabetics. Three-year analysis. *Hypertension*. 1993;21(6\_pt\_1):786-94.
4. Lewis EJ, Hunsicker LG, Bain RP, Rohde RD. The effect of angiotensin-converting-enzyme inhibition on diabetic nephropathy. *New England Journal of Medicine*. 1993;329(20):1456-62.
5. Ravid M, Savin H, Jutrin I, Bental T, Katz B, Lishner M. Long-term stabilizing effect of angiotensin-converting enzyme inhibition on plasma creatinine and on proteinuria in normotensive type II diabetic patients. *Annals of Internal Medicine*. 1993;118(8):577-81.
6. Lebovitz HE, Wiegmann TB, Cnaan A, Shahinfar S, Sica DA, Broadstone V, et al. Renal protective effects of enalapril in hypertensive NIDDM: role of baseline albuminuria. *Kidney International Supplement* 1994;45:S150-5 .
7. Viberti G, Mogensen CE, Groop LC, Pauls JF, Boner G, Van Dyk D, et al. Effect of captopril on progression to clinical proteinuria in patients with insulin-dependent diabetes mellitus and microalbuminuria. *JAMA*. 1994;271(4):275-9.

8. Ravid M, Neumann L, Lishner M. Plasma lipids and the progression of nephropathy in diabetes mellitus type II: effect of ACE inhibitors. *Kidney international*. 1995;47(3):907-10.
9. Agardh CD, Garcia-Puig J, Charbonnel B, Angelkort B, Barnett A. Greater reduction of urinary albumin excretion in hypertensive type II diabetic patients with incipient nephropathy by lisinopril than by nifedipine. *Journal Of Human Hypertension*. 1996;10(3):185-92.
10. Bakris GL, Copley JB, Vicknair N, Sadler R, Leurgans S. Calcium channel blockers versus other antihypertensive therapies on progression of NIDDM associated nephropathy. *Kidney international*. 1996;50(5):1641-50.
11. Schnack C, Hoffmann W, Hopmeier P, Schernthaner G. Renal and metabolic effects of 1-year treatment with ramipril or atenolol in NIDDM patients with microalbuminuria. *Diabetologia*. 1996;39(12):1611-6.
12. Ahmad J, Siddiqui MA, Ahmad H. Effective postponement of diabetic nephropathy with enalapril in normotensive type 2 diabetic patients with microalbuminuria. *Diabetes Care*. 1997;20(10):1576-81.
13. Chaturvedi N, Group ES. Randomised placebo-controlled trial of lisinopril in normotensive patients with insulin-dependent diabetes and normoalbuminuria or microalbuminuria. *The Lancet*. 1997;349(9068):1787-92.
14. Fogari R, Zoppi A, Malamani G, Lusardi P, Destro M, Corradi L. Effects of amlodipine vs enalapril on microalbuminuria in hypertensive patients with type II diabetes. *Clinical Drug Investigation*. 1997;13(1):42-9.
15. Crepaldi G, Carta Q, Deferrari G, Mangili R, Navalesi R, Santeusano F, et al. Effects of lisinopril and nifedipine on the progression to overt albuminuria in IDDM patients with incipient nephropathy and normal blood pressure. *Diabetes Care*. 1998;21(1):104-10.
16. Ravid M, Brosh D, Levi Z, Bar-Dayyan Y, Ravid D, Rachmani R. Use of enalapril to attenuate decline in renal function in normotensive, normoalbuminuric patients with type 2 diabetes mellitus: a randomized, controlled trial. *Annals Of Internal Medicine*. 1998;128(12 Part1):982-8.
17. UKPDS Group. Efficacy of atenolol and captopril in reducing risk of macrovascular and microvascular complications in type 2 diabetes: UKPDS 39. UK Prospective Diabetes Study Group. *BMJ*. 1998;317(7160):713.
18. Fogari R, Zoppi A, Corradi L, Mugellini A, Lazzari P, Preti P, et al. Long-term effects of ramipril and nitrendipine on albuminuria in hypertensive patients with type II diabetes and impaired renal function. *Journal Of Human Hypertension*. 1999;13(1):47-53.
19. Muirhead N, Feagan BF, Mahon J, Lewanczuk RZ, Rodger NW, Botteri F, et al. The effects of valsartan and captopril on reducing microalbuminuria in patients with type 2 diabetes mellitus: a placebo-controlled trial. *Current Therapeutic Research*. 1999;60(12):650-60.

20. Fogari R, Zoppi A, Corradi L, Poletti L, Pasotti M, Fogari E, et al. Long-term effects of amlodipine versus fosinopril on microalbuminuria in elderly hypertensive patients with type 2 diabetes mellitus. *Current Therapeutic Research*. 2000;61(3):163-73.
21. HOPE Study Investigators. Effects of ramipril on cardiovascular and microvascular outcomes in people with diabetes mellitus: results of the HOPE study and MICRO-HOPE substudy. *The Lancet*. 2000;355(9200):253-9.
22. O'Hare P, Bilbous R, Mitchell T, O'Callaghan C, Viberti G, Group A-ITtLAINI-DSS. Low-dose ramipril reduces microalbuminuria in type 1 diabetic patients without hypertension: results of a randomized controlled trial. *Diabetes Care*. 2000;23(12):1823-9.
23. Schrier R. Effect of blood pressure control on diabetic microvascular complications in patients with hypertension and type 2 diabetes. *Diab Care*. 2000;23:B54-B64.
24. Tarnow L, Rossing P, Jensen C, Hansen BV, Parving HH. Long-term renoprotective effect of nisoldipine and lisinopril in type 1 diabetic patients with diabetic nephropathy. *Diabetes Care*. 2000;23(12):1725-30.
25. Lewis EJ, Hunsicker LG, Clarke WR, Berl T, Pohl MA, Lewis JB, et al. Renoprotective effect of the angiotensin-receptor antagonist irbesartan in patients with nephropathy due to type 2 diabetes. *New England Journal of Medicine*. 2001;345(12):851-60.
26. Baines L. Effect of 3 years of antihypertensive therapy on renal structure in type 1 diabetic patients with albuminuria-The European Study for the Prevention of Renal Disease in Type 1 Diabetes (ESPRIT). *Diabetes*. 2001;50(4):843-50.
27. Bojestig M, Karlberg BE, Lindström T, Nystrom FH. Reduction of ACE activity is insufficient to decrease microalbuminuria in normotensive patients with type 1 diabetes. *Diabetes Care*. 2001;24(5):919-24.
28. Brenner BM, Cooper ME, De Zeeuw D, Keane WF, Mitch WE, Parving HH, et al. Effects of losartan on renal and cardiovascular outcomes in patients with type 2 diabetes and nephropathy. *New England Journal Of Medicine*. 2001;345(12):861-9.
29. Parving HH, Lehnert H, Bröchner-Mortensen J, Gomis R, Andersen S, Arner P. The effect of irbesartan on the development of diabetic nephropathy in patients with type 2 diabetes. *New England Journal Of Medicine*. 2001;345(12):870-8.
30. Baba S, J-MIND Study Group. Nifedipine and enalapril equally reduce the progression of nephropathy in hypertensive type 2 diabetics. *Diabetes research and clinical practice*. 2001;54(3):191-201.
31. Katayama S, Kikkawa R, Isogai S, Sasaki N, Matsuura N, Tajima N, et al. Effect of captopril or imidapril on the progression of diabetic nephropathy in Japanese with type 1 diabetes mellitus: a randomized controlled study (JAPAN-IDDM). *Diabetes Research And Clinical Practice*. 2002;55(2):113-21.
32. Fogari R, Preti P, Zoppi A, Rinaldi A, Corradi L, Pasotti C, et al. Effects of amlodipine fosinopril combination on microalbuminuria in hypertensive type 2 diabetic patients. *Am J Hypertens*. 2002;15(12):1042-9.



33. Schrier RW, Estacio RO, Esler A, Mehler P. Effects of aggressive blood pressure control in normotensive type 2 diabetic patients on albuminuria, retinopathy and strokes. *Kidney International*. 2002;61(3):1086-97.
34. Ahmad J, Shafique S, Abidi SA, Parwez I. Effect of 5-year enalapril therapy on progression of microalbuminuria and glomerular structural changes in type 1 diabetic subjects. *Diabetes Research And Clinical Practice*. 2003;60(2):131-8.
35. Marre M, Puig JG, Kokot F, Fernandez M, Jermendy G, Opie L, et al. Equivalence of indapamide SR and enalapril on microalbuminuria reduction in hypertensive patients with type 2 diabetes: The NESTOR study. *Journal Of Hypertension*. 2004;22(8):1613-22.
36. Jerums G, Allen TJ, Campbell D, Cooper ME, Gilbert RE, Hammond J, et al. Long-term renoprotection by perindopril or nifedipine in non-hypertensive patients with Type 2 diabetes and microalbuminuria. *Diabetic Medicine*. 2004;21(11):1192-9.
37. Ruggenenti P, Fassi A, Ilieva AP, Bruno S, Iliev IP, Brusegan V, et al. Preventing Microalbuminuria in Type 2 Diabetes. *N Engl J Med*. 2004;351(19):1941-51.
38. Dalla Vestra M, Pozza G, Mosca A, Grazioli V, Lapolla A, Fioretto P, et al. Effect of lercanidipine compared with ramipril on albumin excretion rate in hypertensive Type 2 diabetic patients with microalbuminuria: DIAL Study (Diabete, Ipertensione, Albuminuria, Lercanidipina). *Cardiovascular Therapy And Prevention*. 2004;9(7):41-8.
39. Fogari R, Mugellini A, Zoppi A, Lazzari P, Destro M, Rinaldi A, et al. Effect of successful hypertension control by manidipine or lisinopril on albuminuria and left ventricular mass in diabetic hypertensive patients with microalbuminuria. *European Journal Of Clinical Pharmacology*. 2005;61(7):483-90.
40. Ogawa S, Takeuchi K, Mori T, Nako K, Tsubono Y, Ito S. Effects of monotherapy of temocapril or candesartan with dose increments or combination therapy with both drugs on the suppression of diabetic nephropathy. *Hypertension Research*. 2007;30(4):325-34.
41. Makino H, Haneda M, Babazono T, Moriya T, Ito S, Iwamoto Y, et al. Microalbuminuria reduction with telmisartan in normotensive and hypertensive Japanese patients with type 2 diabetes: a post-hoc analysis of The Incipient to Overt: Angiotensin II Blocker, Telmisartan, Investigation on Type 2 Diabetic Nephropathy (INNOVATION) study. *Hypertension Research*. 2008;31(4):657-64.
42. Bilous R, Chaturvedi N, Sjøllie AK, Fuller J, Klein R, Orchard T, et al. Effect of candesartan on microalbuminuria and albumin excretion rate in diabetes: three randomized trials. *Annals Of Internal Medicine*. 2009;151(1):11-20.
43. Chaturvedi N, Porta M, Klein R, Orchard T, Fuller J, Parving HH, et al. Effect of candesartan on prevention (DIRECT-Prevent 1) and progression (DIRECT-Protect 1) of retinopathy in type 1 diabetes: randomised, placebo-controlled trials. *The Lancet*. 2008;372(9647):1394-402.

44. Sjøllie AK, Klein R, Porta M, Orchard T, Fuller J, Parving HH, et al. Effect of candesartan on progression and regression of retinopathy in type 2 diabetes (DIRECT-Protect 2): a randomised placebo-controlled trial. *The Lancet*. 2008;372(9647):1385-93.
45. Mauer M, Zinman B, Gardiner R, Suissa S, Sinaiko A, Strand T, et al. Renal and retinal effects of enalapril and losartan in type 1 diabetes. *New England Journal Of Medicine*. 2009;361(1):40-51.
46. Haller H, Ito S, Izzo Jr JL, Januszewicz A, Katayama S, Menne J, et al. Olmesartan for the delay or prevention of microalbuminuria in type 2 diabetes. *New England Journal of Medicine*. 2011;364(10):907-17.
47. Ruggenenti P, Fassi A, Ilieva AP, Iliev IP, Chiurciu C, Rubis N, et al. Effects of verapamil added-on trandolapril therapy in hypertensive type 2 diabetes patients with microalbuminuria: the BENEDICT-B randomized trial. *Journal of hypertension*. 2011;29(2):207-16.
48. Evans M, Bain SC, Hogan S, Bilous RW. Irbesartan delays progression of nephropathy as measured by estimated glomerular filtration rate: post hoc analysis of the Irbesartan Diabetic Nephropathy Trial. *Nephrology Dialysis Transplantation*. 2012;27(6):2255-63.
49. Weil EJ, Fufaa G, Jones LI, Lovato T, Lemley KV, Hanson RL, et al. Effect of losartan on prevention and progression of early diabetic nephropathy in American Indians with type 2 diabetes. *Diabetes*. 2013;62(9):3224-31.
50. Fuchs FD, Scala LCN, Vilela-Martin JF, de Mello RB, Mosele F, Whelton PK, et al. Effectiveness of chlorthalidone/amiloride versus losartan in patients with stage I hypertension: results from the PREVER-treatment randomized trial. *Journal Of Hypertension*. 2016;34(4):798-806.
