# Supplementary material for: The effect of renin–angiotensin–aldosterone system inhibitors on continuous and binary kidney outcomes in subgroups of patients with diabetes: a meta-analysis of randomized clinical trials
Source: Springer Nature journal article supplement (doi:10.1186/s12882-022-02763-1), 2022-04-28
Supplement: MOESM2 [file 20353758]

# The Effect of Renin-Angiotensin-Aldosterone System Inhibitors on Binary and Continuous Renal Outcomes in Subgroups of Patients with Diabetes: An Extensive Meta-Analysis

## Supplement 2

### Table of Contents

|                                                                                                                                                  |    |
|--------------------------------------------------------------------------------------------------------------------------------------------------|----|
| SUPP 2. TABLE 1: SUBGROUP ANALYSIS OF MEAN DIFFERENCE OF EGFR IN RAASI <i>VERSUS</i> PLACEBO .....                                               | 2  |
| SUPP 2. TABLE 2: SUBGROUP ANALYSIS OF MEAN DIFFERENCE OF EGFR IN RAASI <i>VERSUS</i> ACTIVE TREATMENTS.                                          | 3  |
| SUPP 2. TABLE 3: SUBGROUP ANALYSIS OF SERUM CREATININE LEVELS IN RAASI <i>VERSUS</i> PLACEBO.....                                                | 4  |
| SUPP 2. TABLE 4: SUBGROUP ANALYSIS OF SERUM CREATININE LEVELS IN RAASI <i>VERSUS</i> ACTIVE TREATMENTS .                                         | 5  |
| SUPP 2. TABLE 5: SUBGROUP ANALYSIS OF ALBUMINURIA LEVEL IN RAASI <i>VERSUS</i> PLACEBO .....                                                     | 7  |
| SUPP 2. TABLE 6: SUBGROUP ANALYSIS OF ALBUMINURIA LEVEL IN RAASI <i>VERSUS</i> ACTIVE TREATMENTS .....                                           | 8  |
| SUPP 2. FIGURE 1A: FOREST PLOT FOR KIDNEY FAILURE IN TRIALS COMPARING RAAS INHIBITORS <i>VERSUS</i> PLACEBO .....                                | 10 |
| SUPP 2. FIGURE 2A: FOREST PLOT FOR DOUBLING OF SERUM CREATININE IN TRIALS COMPARING RAAS INHIBITORS <i>VERSUS</i> PLACEBO .....                  | 10 |
| SUPP 2. FIGURE 2B: FOREST PLOT FOR DOUBLING OF SERUM CREATININE IN TRIALS COMPARING RAAS INHIBITORS <i>VERSUS</i> OTHER ANTI-HYPERTENSIVES ..... | 11 |
| SUPP 2. TABLE 7: META ANALYSIS FOR BINARY OUTCOMES OF RAASI <i>VERSUS</i> PLACEBO.....                                                           | 13 |
| SUPP 2. TABLE 8: META ANALYSIS FOR BINARY OUTCOMES OF RAASI <i>VERSUS</i> ACTIVE TREATMENTS .....                                                | 13 |
| SUPP 2. TABLE 9: SUBGROUP ANALYSIS FOR KIDNEY FAILURE RAASI <i>VERSUS</i> PLACEBO.....                                                           | 14 |
| SUPP 2. TABLE 10: SUBGROUP ANALYSIS FOR KIDNEY FAILURE RAASI <i>VERSUS</i> ACTIVE TREATMENTS.....                                                | 15 |
| SUPP 2. TABLE 11: SUBGROUP ANALYSIS FOR DOUBLING OF SRCR IN RAASI <i>VERSUS</i> PLACEBO .....                                                    | 16 |
| SUPP 2. TABLE 12: SUBGROUP ANALYSIS FOR DOUBLING OF SRCR IN RAASI <i>VERSUS</i> ACTIVE TREATMENTS .....                                          | 17 |
| SUPP 2. TABLE 13: SUBGROUP ANALYSIS FOR REGRESSION OF ALBUMINURIA IN RAASI <i>VERSUS</i> PLACEBO .....                                           | 18 |
| SUPP 2. TABLE 14: SUBGROUP ANALYSIS FOR REGRESSION OF ALBUMINURIA IN RAASI <i>VERSUS</i> ACTIVE TREATMENT.....                                   | 19 |
| SUPP 2. TABLE 15: SUBGROUP ANALYSIS FOR ALL-CAUSE MORTALITY IN RAASI <i>VERSUS</i> PLACEBO .....                                                 | 20 |
| SUPP 2. TABLE 16: SUBGROUP ANALYSIS FOR ALL-CAUSE MORTALITY IN RAASI <i>VERSUS</i> ACTIVE TREATMENTS..                                           | 21 |
| SUPP 2. TABLE 17: SUBGROUP ANALYSIS FOR DISRUPTIVE COUGH IN RAASI <i>VERSUS</i> PLACEBO .....                                                    | 23 |
| SUPP 2. TABLE 18: SUBGROUP ANALYSIS FOR DISRUPTIVE COUGH IN RAASI <i>VERSUS</i> ACTIVE TREATMENT.....                                            | 24 |
| SUPP 2. TABLE 19: SUBGROUP ANALYSIS FOR THE NEED OF ADDITIONAL ANTIHYPERTENSIVES IN RAASI <i>VERSUS</i> PLACEBO .....                            | 25 |
| SUPP 2. TABLE 20: SUBGROUP ANALYSIS FOR THE NEED OF ADDITIONAL ANTIHYPERTENSIVES IN RAASI <i>VERSUS</i> ACTIVE TREATMENT .....                   | 25 |
| SUPP 2. TABLE 21: META-ANALYSIS OF WITHDRAWAL REASONS IN RAASI <i>VERSUS</i> PLACEBO .....                                                       | 27 |
| SUPP 2. TABLE 22: META-ANALYSIS OF WITHDRAWAL REASONS IN RAASI <i>VERSUS</i> ACTIVE TREATMENTS .....                                             | 27 |

SUPP 2. TABLE 23: RESULTS FOR OVERALL META- ANALYSIS FOR RAASI VERSUS PLACEBO OR OTHER ANTI-HTN DRUGS (CONTINUOUS OUTCOMES) ..... 27

SUPP 2. TABLE 24A: SENSITIVITY ANALYSIS RESULTS FOR OVERALL META- ANALYSIS AFTER EXCLUDING OUTLIER STUDIES..... 28

SUPP 2. TABLE 25: EXCLUDED STUDIES FROM SENSITIVITY ANALYSIS ..... 29

**Supp 2. Table 1: Subgroup analysis of mean difference of eGFR in RAASI versus placebo**

| Subgroup Analysis According to : | No. Of Trials | N° patients RAASi /Placebo | RMD   | 95% CI        | I <sup>2</sup> | p value * |
|----------------------------------|---------------|----------------------------|-------|---------------|----------------|-----------|
| <b>Type of diabetes</b>          |               |                            |       |               |                |           |
| Type 1 DM                        | 5             | 302/211                    | -0.9  | -7.8; 6.01    | 7%             | 0.36      |
| Type 2 DM                        | 7             | 2785/2749                  | -0.49 | -7.26; 6.28   | 92%            | <0.01     |
| <b>Albuminuria</b>               |               |                            |       |               |                |           |
| Microalbuminuria                 | 7             | 423/408                    | 2.2   | -4.26; 8.65   | 69%            | <0.01     |
| Normoalbuminuria                 | 3             | 2519/2407                  | -0.12 | -5.77; 5.53   | 95%            | <0.01     |
| Missing                          | 1             | 18/18                      | -7.2  | -19.58; 5.18  | NA             |           |
| Mixed                            | 1             | 127/127                    | -13.8 | -18.87, -8.73 | NA             |           |
| <b>CKD status</b>                |               |                            |       |               |                |           |
| CKD any stage                    | 2             | 2255/2242                  | 4.64  | -13.20; 22.48 | 91%            | <0.01     |
| No CKD                           | 9             | 814/700                    | -2.64 | -7.19; 1.91   | 86%            | <0.01     |
| Missing                          | 1             | 18/18                      | 10    | -3.96; 23.96  | NA             |           |
| <b>HTN status</b>                |               |                            |       |               |                |           |
| Yes                              | 8             | 2613/2574                  | -5.86 | -12.92; 1.20  | 81%            | <0.01     |
| No                               | 4             | 474/386                    | 2.22  | -3.36; 7.79   | 57%            | 0.02      |
| <b>DM duration</b>               |               |                            |       |               |                |           |
| < 10 years                       | 6             | 2725/2718                  | -1.04 | -8.51; 6.44   | 93%            | <0.01     |
| ≥ 10 years                       | 5             | 302/211                    | -0.9  | -7.80; 6.01   | 7%             | 0.36      |
| Missing                          | 1             | 60/31                      | 6.76  | -11.13; 24.64 | NA             |           |
| <b>Age categories</b>            |               |                            |       |               |                |           |
| < 60 years                       | 11            | 2960/2833                  | 0.55  | -3.81; 4.90   | 83%            | <0.01     |
| ≥ 60 years                       | 1             | 127/127                    | -13.8 | -18.87; -8.73 | NA             |           |
| <b>BMI categories</b>            |               |                            |       |               |                |           |
| Missing                          | 3             | 59/63                      | 6.01  | -7.19; 19.20  | 72%            | 0.03      |

|                            |   |           |       |                 |     |       |
|----------------------------|---|-----------|-------|-----------------|-----|-------|
| < 30                       | 6 | 542/450   | -2.29 | -8.28; 3.70     | 89% | <0.01 |
| ≥ 30                       | 3 | 2486/2447 | -3.65 | -8.90; 1.60     | 7%  | 0.34  |
| <b>Study size</b>          |   |           |       |                 |     |       |
| < 100                      | 5 | 151/128   | 4.81  | -3.29;<br>12.92 | 51% | 0.09  |
| ≥ 100                      | 7 | 2936/2832 | -3.39 | -8.11; 1.34     | 90% | <0.01 |
| <b>Study duration</b>      |   |           |       |                 |     |       |
| ≤ 2years                   | 4 | 316/296   | -0.08 | -9.60; 9.45     | 51% | 0.1   |
| > 2years                   | 8 | 2771/2664 | -1.02 | -6.77; 4.73     | 90% | <0.01 |
| <b>Year of Publication</b> |   |           |       |                 |     |       |
| < 2000                     | 4 | 241/213   | 3.46  | -0.06; 6.97     | 12% | 0.33  |
| ≥ 2000                     | 8 | 2846/2747 | -2.54 | -9.25; 4.16     | 77% | <0.01 |

**Supp 2. Table 2: Subgroup analysis of mean difference of eGFR in RAASi versus active treatments**

| Subgroup Analysis According to : | No. Of Trials | N° patients RAASi /Placebo | RMD   | 95% CI          | I <sup>2</sup> | p value * |
|----------------------------------|---------------|----------------------------|-------|-----------------|----------------|-----------|
| <b>Type of diabetes</b>          |               |                            |       |                 |                |           |
| Type 1 DM                        | 3             | 75/71                      | -5.38 | -10.66; -0.11   | 2%             | 0.36      |
| Type 2 DM                        | 12            | 1136/1164                  | -0.4  | -4.48; 3.68     | 88%            | <0.01     |
| Both                             | 1             | 23/27                      | -1    | -9.70;7.70      | NA             |           |
| <b>Albuminuria</b>               |               |                            |       |                 |                |           |
| Microalbuminuria                 | 8             | 598/596                    | -0.72 | -6.73; 5.29     | 71%            | <0.01     |
| Mixed                            | 3             | 286/299                    | -0.28 | -3.14; 2.58     | 3%             | 0.36      |
| Macroalbuminuria                 | 4             | 332/349                    | -0.37 | -6.12; 5.39     | 95%            | <0.01     |
| Missing                          | 1             | 18/18                      | -9.31 | -22.24;<br>3.62 | NA             |           |
| <b>CKD status</b>                |               |                            |       |                 |                |           |
| CKD any stage                    | 7             | 573/595                    | -0.76 | -4.53; 3.00     | 91%            | <0.01     |
| No CKD                           | 9             | 661/667                    | -1.2  | -6.66; 4.27     | 68%            | <0.01     |
| <b>HTN status</b>                |               |                            |       |                 |                |           |
| Missing                          | 1             | 23/27                      | -1    | -9.70; 7.70     | NA             |           |
| Yes                              | 12            | 1138/1164                  | -0.6  | -4.63; 3.44     | 90%            | <0.01     |
| No                               | 3             | 73/71                      | -4.53 | -11.58;<br>2.53 | 0%             | 0.44      |
| <b>DM duration</b>               |               |                            |       |                 |                |           |
| Missing                          | 1             | 46/45                      | 21    | 9.11; 32.89     | NA             |           |
| < 10 years                       | 10            | 1072/1085                  | -1.92 | -3.96; 0.13     | 47%            | 0.05      |
| ≥ 10 years                       | 5             | 116/132                    | -1.01 | -6.82; 4.79     | 93%            | <0.01     |
| <b>Age categories</b>            |               |                            |       |                 |                |           |
| < 60 years                       | 13            | 928/955                    | -1.3  | -3.83; 1.23     | 85%            | <0.01     |

|                            |    |         |       |                  |     |       |
|----------------------------|----|---------|-------|------------------|-----|-------|
| ≥ 60 years                 | 3  | 306/307 | 3.6   | -12.36;<br>19.57 | 90% | <0.01 |
| <b>BMI categories</b>      |    |         |       |                  |     |       |
| Missing                    | 4  | 232/239 | -4.43 | -10.18;<br>1.33  | 0%  | 0.71  |
| < 30                       | 9  | 695/701 | -1.07 | -6.21; 4.08      | 80% | <0.01 |
| ≥ 30                       | 3  | 307/322 | 1.97  | -3.70; 7.63      | 92% | <0.01 |
| <b>Study size</b>          |    |         |       |                  |     |       |
| < 100                      | 10 | 332/362 | -1.29 | -6.83; 4.26      | 90% | <0.01 |
| ≥ 100                      | 6  | 902/900 | -0.65 | -1.86; 0.57      | 18% | 0.3   |
| <b>Study duration</b>      |    |         |       |                  |     |       |
| ≤ 2years                   | 8  | 713/712 | -0.16 | -5.88; 5.56      | 71% | <0.01 |
| > 2years                   | 8  | 521/550 | -1.8  | -5.55; 1.96      | 92% | <0.01 |
| <b>Year of Publication</b> |    |         |       |                  |     |       |
| < 2000                     | 9  | 484/509 | 0.61  | -4.84; 6.05      | 88% | <0.01 |
| ≥ 2000                     | 7  | 750/753 | -2.7  | -5.14; -0.26     | 51% | 0.06  |

**Supp 2. Table 3: Subgroup analysis of serum creatinine levels in RAASi versus placebo**

| Subgroup Analysis According to : | No. Of Trials | N° patients RAASi /Placebo | MD     | 95% CI        | I <sup>2</sup> | p value * |
|----------------------------------|---------------|----------------------------|--------|---------------|----------------|-----------|
| <b>Type of diabetes</b>          |               |                            |        |               |                |           |
| Type1DM                          | 1             | 32/34                      | -16    | -24.36; -7.64 |                |           |
| Type2DM                          | 3             | 691/672                    | -12.91 | -16.46; -9.35 | 0%             | 0.99      |
| <b>Albuminuria</b>               |               |                            |        |               |                |           |
| Micro                            | 2             | 81/79                      | -13.59 | -17.36; -9.81 | 0%             | 0.52      |
| Mixed                            | 1             | 63/58                      | 11.62  | -42.41; 19.16 |                |           |
| Macro                            | 1             | 579/569                    | 12.42  | -22.21; -2.63 |                |           |
| <b>CKD status</b>                |               |                            |        |               |                |           |
| CKD any stage                    | 2             | 642/627                    | 12.35  | -21.67; -3.02 | 0%             | 0.96      |
| No CKD                           | 2             | 81/79                      | 13.59  | -17.36; -9.81 | 0%             | 0.52      |
| <b>HTN status</b>                |               |                            |        |               |                |           |
| Yes                              | 2             | 642/627                    | 12.35  | -21.67; -3.02 | 0%             | 0.96      |
| No                               | 2             | 81/79                      | 13.59  | -17.36; -9.81 | 0%             | 0.52      |

|                            |   |         |        |                |    |      |
|----------------------------|---|---------|--------|----------------|----|------|
| <b>DM duration</b>         |   |         |        |                |    |      |
| <10 years                  | 2 | 112/103 | -12.98 | -16.79; -9.17  | 0% | 0.93 |
| >= 10 years                | 1 | 32/34   | -16    | -24.36; -7.64  |    |      |
| missing                    | 1 | 579/569 | -12.42 | -22.21; -2.63  |    |      |
| <b>Age categories</b>      |   |         |        |                |    |      |
| <60 years                  | 4 | 723/706 | -13.4  | -16.78; -10.01 | 0% | 0.93 |
| >= 60 years                | 0 |         |        |                |    |      |
| <b>BMI categories</b>      |   |         |        |                |    |      |
| missing                    | 2 | 112/103 | -12.98 | -16.79; -9.17  | 0% | 0.93 |
| <30                        | 1 | 32/34   | -16    | -24.36; -7.64  |    |      |
| >=30                       | 1 | 579/569 | -12.42 | -22.21; -2.63  |    |      |
| <b>Study size</b>          |   |         |        |                |    |      |
| <100                       | 2 | 81/79   | -13.59 | -17.36; -9.81  | 0% | 0.52 |
| >=100                      | 2 | 642/627 | -12.35 | -21.67; -3.02  | 0% | 0.96 |
| <b>Study duration</b>      |   |         |        |                |    |      |
| <=2years                   | 0 |         |        |                |    |      |
| > 2years                   | 4 | 723/706 | -13.4  | -16.78; -10.01 | 0% | 0.93 |
| <b>Year of Publication</b> |   |         |        |                |    |      |
| <2000                      | 3 | 144/137 | -13.54 | -17.21; -9.87  | 0% | 0.81 |
| >=2000                     | 1 | 579/569 | -12.42 | -22.21; -2.63  |    |      |

**Supp 2. Table 4: Subgroup analysis of serum creatinine levels in RAASi versus active treatments**

| Subgroup Analysis According to : | No. Of Trials | N° patients RAASi /Other Anti-HTN | MD    | 95% CI      | I <sup>2</sup> | p value |
|----------------------------------|---------------|-----------------------------------|-------|-------------|----------------|---------|
| <b>Type of diabetes</b>          |               |                                   |       |             |                |         |
| Type1DM                          | 2             | 57/53                             | -8.78 | -23.2; 5.64 | 15%            | 0.28    |
| Type2DM                          | 6             | 1093/1107                         | 2.04  | -4.04; 8.12 | 67%            | 0.01    |
| <b>Albuminuria</b>               |               |                                   |       |             |                |         |

|                            |   |           |        |               |     |       |
|----------------------------|---|-----------|--------|---------------|-----|-------|
| Micro                      | 1 | 32/26     | -12    | -19.12; -4.88 |     |       |
| Mixed                      | 4 | 460/487   | 3.54   | -1.17; 8.25   | 58% | 0.07  |
| Macro                      | 3 | 658/647   | -1.8   | -14.9; 11.31  | 54% | 0.12  |
| <b>CKD status</b>          |   |           |        |               |     |       |
| CKD any stage              | 6 | 1084/1094 | 2.27   | -4.28; 8.82   | 67% | 0.01  |
| No CKD                     | 2 | 66/66     | -5.5   | -18.14; 7.15  | 82% | 0.02  |
| <b>HTN status</b>          |   |           |        |               |     |       |
| Yes                        | 7 | 1118/1134 | 2.11   | -3.43; 7.64   | 60% | 0.02  |
| No                         | 1 | 32/26     | -12    | -19.12; -4.88 |     |       |
| <b>DM duration</b>         |   |           |        |               |     |       |
| <10 years                  | 5 | 514/540   | 3.82   | -0.52; 8.15   | 47% | 0.11  |
| >= 10 years                | 2 | 57/53     | -8.78  | -23.2; 5.64   | 15% | 0.28  |
| missing                    | 1 | 579/567   | -10.62 | -20.40; -0.84 |     |       |
| <b>Age categories</b>      |   |           |        |               |     |       |
| <60 years                  | 6 | 917/905   | -1.49  | -8.91; 5.94   | 71% | <0.01 |
| >= 60 years                | 2 | 233/255   | 6.28   | 2.52; 10.03   | 0%  | 0.93  |
| <b>BMI categories</b>      |   |           |        |               |     |       |
| missing                    | 2 | 376/395   | 2.93   | -3.54; 9.4    | 82% | 0.02  |
| <30                        | 4 | 141/145   | -0.47  | -10.58; 9.63  | 75% | <0.01 |
| >=30                       | 2 | 633/620   | -2.26  | -20.31; 15.8  | 74% | 0.05  |
| <b>Study size</b>          |   |           |        |               |     |       |
| <100                       | 5 | 195/198   | 0.87   | -7.96; 9.7    | 72% | <0.01 |
| >=100                      | 3 | 955/962   | -0.77  | -9.9; 8.35    | 76% | <0.01 |
| <b>Study duration</b>      |   |           |        |               |     |       |
| <=2years                   | 4 | 480/500   | 4.38   | -0.66; 9.42   | 59% | 0.06  |
| > 2years                   | 4 | 670/660   | -6.36  | -14.46; 1.75  | 56% | 0.08  |
| <b>Year of Publication</b> |   |           |        |               |     |       |
| <2000                      | 5 | 338/338   | 0.24   | -7.59; 8.07   | 72% | <0.01 |

|        |   |         |      |                  |     |       |
|--------|---|---------|------|------------------|-----|-------|
| >=2000 | 3 | 812/822 | -0.3 | -11.51;<br>10.91 | 80% | <0.01 |
|--------|---|---------|------|------------------|-----|-------|

**Supp 2. Table 5: Subgroup analysis of albuminuria level in RAASi *versus* placebo**

| Subgroup Analysis According to : | No. Of Trials | N° patients RAASi /Placebo | SMD   | C95% CI      | I <sup>2</sup> | p value * |
|----------------------------------|---------------|----------------------------|-------|--------------|----------------|-----------|
| <b>Type of diabetes</b>          |               |                            |       |              |                |           |
| Type 1 DM                        | 8             | 437/320                    | -1.05 | -2.00; -0.10 | 66%            | <0.01     |
| Type 2 DM                        | 6             | 475/452                    | -1.06 | -1.77; -0.36 | 90%            | <0.01     |
| Both                             | 1             | 2613/2618                  | -0.37 | -0.42; -0.32 | NA             |           |
| <b>Albuminuria</b>               |               |                            |       |              |                |           |
| Microalbuminuria                 | 10            | 555/535                    | -1.3  | -2.07; -0.53 | 94%            | <0.01     |
| Normoalbuminuria                 | 3             | 2900/2810                  | -0.44 | -1.30; -0.42 | 97%            | <0.01     |
| Missing                          | 2             | 70/45                      | -0.42 | -0.80; -0.04 | 0%             | 0.87      |
| <b>CKD status</b>                |               |                            |       |              |                |           |
| CKD any stage                    | 1             | 23/27                      | 0.62  | 0.05; 1.19   | NA             |           |
| No CKD                           | 13            | 3484/3345                  | -1.2  | -1.77; -0.64 | 96%            | <0.01     |
| Missing                          | 1             | 18/18                      | 0.1   | -0.55; 0.75  | NA             |           |
| <b>HTN status</b>                |               |                            |       |              |                |           |
| Yes                              | 4             | 2919/2877                  | -0.76 | -1.19; -0.33 | 96%            | <0.01     |
| No                               | 11            | 606/513                    | -1.1  | -1.86; -0.33 | 96%            | <0.01     |
| <b>DM duration</b>               |               |                            |       |              |                |           |
| <10 years                        | 6             | 452/457                    | -1.3  | -2.12; -0.47 | 92%            | <0.01     |
| ≥ 10 years                       | 9             | 3013/2902                  | -0.8  | -1.67; -0.08 | 95%            | <0.01     |
| <b>Age categories</b>            |               |                            |       |              |                |           |
| <60 years                        | 14            | 3488/3354                  | -0.91 | -1.47; -0.34 | 96%            | <0.01     |
| ≥ 60 years                       | 1             | 37/36                      | -2.4  | -3.01; -1.79 | NA             |           |
| <b>BMI categories</b>            |               |                            |       |              |                |           |

|                            |   |           |           |                  |     |       |
|----------------------------|---|-----------|-----------|------------------|-----|-------|
| Missing                    | 6 | 206/181   | -<br>0.61 | -1.40;<br>0.18   | 92% | <0.01 |
| < 30                       | 7 | 3065/2977 | -<br>1.32 | -2.31; -<br>0.32 | 97% | <0.01 |
| ≥ 30                       | 2 | 254/232   | -<br>1.16 | -1.51; -<br>0.82 | 52% | <0.01 |
| <b>Study size</b>          |   |           |           |                  |     |       |
| <100                       | 9 | 335/282   | -<br>1.14 | -1.98; -<br>0.30 | 94% | <0.01 |
| ≥ 100                      | 6 | 3525/3390 | -<br>0.81 | -1.50; -<br>0.11 | 97% | <0.01 |
| <b>Study duration</b>      |   |           |           |                  |     |       |
| ≤ 2years                   | 6 | 414/369   | -<br>0.82 | -2.00; -<br>0.28 | 97% | <0.01 |
| > 2years                   | 9 | 3111/3021 | -<br>1.14 | -1.46; -<br>0.18 | 91% | <0.01 |
| <b>Year of Publication</b> |   |           |           |                  |     |       |
| <2000                      | 6 | 336/304   | -<br>1.83 | -2.53; -<br>1.12 | 89% | <0.01 |
| ≥ 2000                     | 9 | 3189/3086 | -<br>0.45 | -1.03,<br>0.14   | 95% | <0.01 |
| <b>Mean type</b>           |   |           |           |                  |     |       |
| Arithmetic                 | 9 | 3289/3181 | -<br>0.86 | -1.59; -<br>0.14 | 96% | <0.01 |
| Geometric                  | 6 | 236/209   | -<br>1.22 | -2.17; -<br>0.27 | 94% | <0.01 |

**Supp 2. Table 6: Subgroup analysis of albuminuria level in RAASi *versus* active treatments**

| Subgroup Analysis According to : | No. Of Trials | N° patients RAASi /Placebo | SMD       | C95% CI          | I <sup>2</sup> | p value * |
|----------------------------------|---------------|----------------------------|-----------|------------------|----------------|-----------|
| <b>Type of diabetes</b>          |               |                            |           |                  |                |           |
| Type 1 DM                        | 3             | 75/71                      | -<br>1.47 | -3.10; 0.16      | 93%            | <0.01     |
| Type 2 DM                        | 14            | 1573/1614                  | -0.4      | -0.74; -<br>0.05 | 89%            | <0.01     |
| Both                             | 1             | 23/27                      | -<br>0.26 | -0.82; 0.29      | NA             |           |
| <b>Albuminuria</b>               |               |                            |           |                  |                |           |
| Macroalbuminuria                 | 4             | 332/349                    | -<br>1.55 | -3.06; -<br>0.04 | 97%            | <0.01     |
| Microalbuminuria                 | 8             | 641/642                    | -<br>0.26 | -0.44; -<br>0.08 | 10%            | 0.35      |
| Mixed                            | 5             | 680/703                    | -<br>0.28 | -0.60; 0.04      | 90%            | <0.01     |



|                            |    |           |           |                  |     |       |
|----------------------------|----|-----------|-----------|------------------|-----|-------|
| Missing                    | 1  | 18/18     | -<br>0.41 | -1.08; 0.25      | NA  |       |
| <b>CKD status</b>          |    |           |           |                  |     |       |
| CKD any stage              | 9  | 967/999   | -<br>0.79 | -1.57; -<br>0.02 | 95% | <0.01 |
| No CKD                     | 9  | 704/713   | -<br>0.31 | -0.49; -<br>0.13 | 34% | 0.15  |
| <b>HTN status</b>          |    |           |           |                  |     |       |
| Yes                        | 14 | 1329/1380 | -<br>0.57 | -1.12; -<br>0.03 | 92% | <0.01 |
| No                         | 4  | 3019/305  | -<br>0.63 | -0.90; -<br>0.37 | 0%  | 0.44  |
| <b>DM duration</b>         |    |           |           |                  |     |       |
| < 10 years                 | 12 | 1466/1489 | -<br>0.44 | -0.84; -<br>0.04 | 91% | <0.01 |
| ≥ 10 years                 | 6  | 205/223   | -<br>0.81 | -1.72; 0.11      | 90% | <0.01 |
| <b>Age categories</b>      |    |           |           |                  |     |       |
| < 60 years                 | 11 | 732/736   | -<br>0.83 | -1.44; -<br>0.22 | 92% | <0.01 |
| ≥ 60 years                 | 7  | 939/976   | -<br>0.15 | -0.28; -<br>0.01 | 43% | 0.11  |
| <b>BMI categories</b>      |    |           |           |                  |     |       |
| Missing                    | 5  | 380/409   | -<br>0.12 | -0.34; 0.10      | 45% | 0.12  |
| < 30                       | 9  | 738/747   | -<br>0.58 | -1.20; 0.03      | 86% | <0.01 |
| ≥ 30                       | 4  | 553/556   | -<br>0.95 | -2.05; 0.16      | 96% | <0.01 |
| <b>Study size</b>          |    |           |           |                  |     |       |
| < 100                      | 9  | 286/317   | -<br>0.95 | -1.67; -<br>0.22 | 92% | <0.01 |
| ≥ 100                      | 9  | 1385/1395 | -<br>0.21 | -0.37; -<br>0.05 | 79% | <0.01 |
| <b>Study duration</b>      |    |           |           |                  |     |       |
| ≤ 2years                   | 9  | 904/928   | -<br>0.39 | -0.93; 0.16      | 92% | <0.01 |
| > 2years                   | 9  | 767/784   | -<br>0.73 | -1.30; -<br>0.15 | 86% | <0.01 |
| <b>Year of Publication</b> |    |           |           |                  |     |       |
| < 2000                     | 8  | 438/464   | -<br>0.62 | -1.21; -<br>0.03 | 92% | <0.01 |
| ≥ 2000                     | 10 | 1233/1248 | -<br>0.50 | -1.06; 0.05      | 89% | <0.01 |
| <b>Mean type</b>           |    |           |           |                  |     |       |
| Arithmetic                 | 9  | 697/729   | -<br>0.49 | -1.04; 0.06      | 92% | <0.01 |

|           |   |         |       |              |     |       |
|-----------|---|---------|-------|--------------|-----|-------|
| Geometric | 9 | 974/983 | -0.62 | -1.22; -0.03 | 88% | <0.01 |
|-----------|---|---------|-------|--------------|-----|-------|

**Supp 2. Figure 1A: Forest plot for kidney failure in trials comparing RAAS inhibitors *versus* placebo**

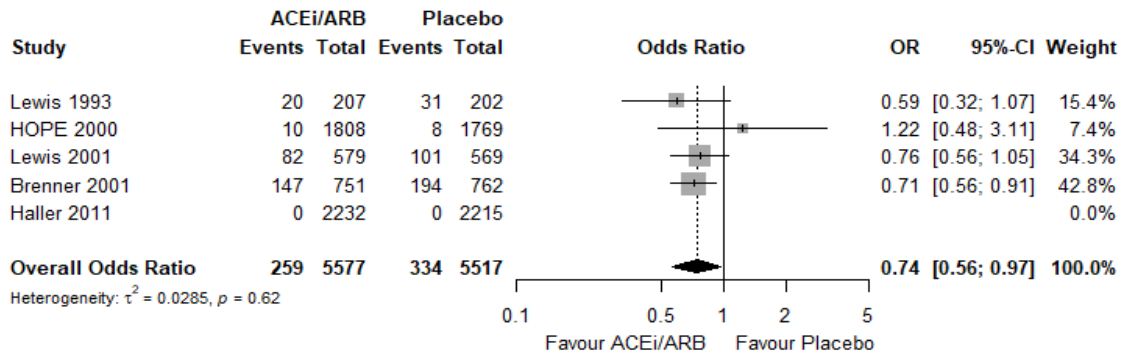

**Supp 2. Figure 1B: Forest plot for kidney failure in trials comparing RAAS inhibitors *versus* other anti-hypertensives**

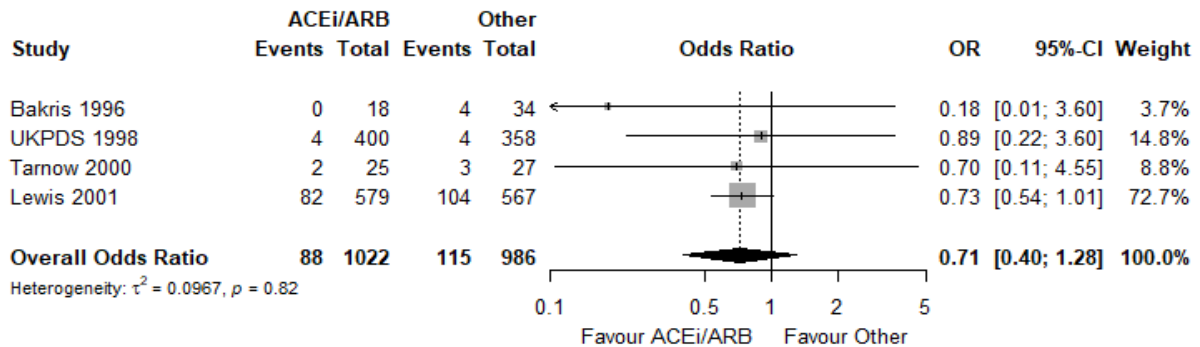

**Supp 2. Figure 2A: Forest plot for doubling of serum creatinine in trials comparing RAAS inhibitors *versus* placebo**

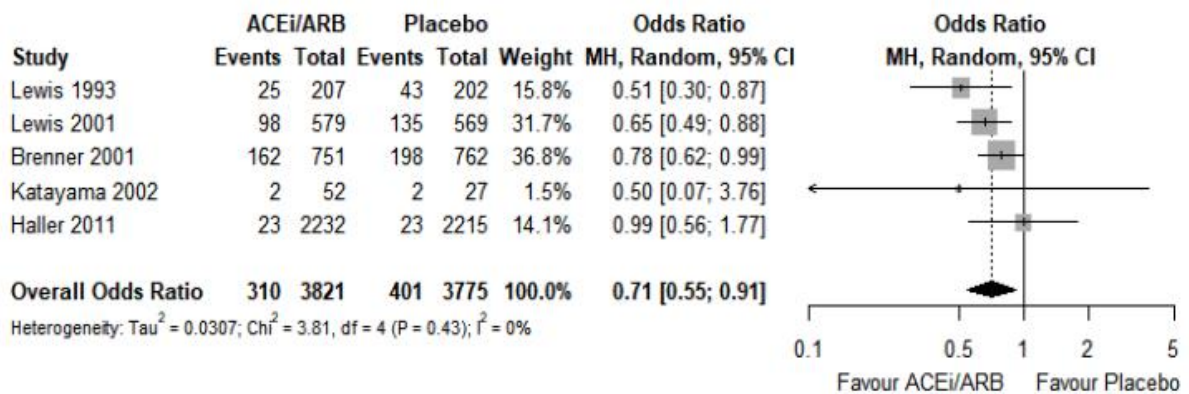

**Supp 2. Figure 2B: Forest plot for doubling of serum creatinine in trials comparing RAAS inhibitors *versus* other anti-hypertensives**

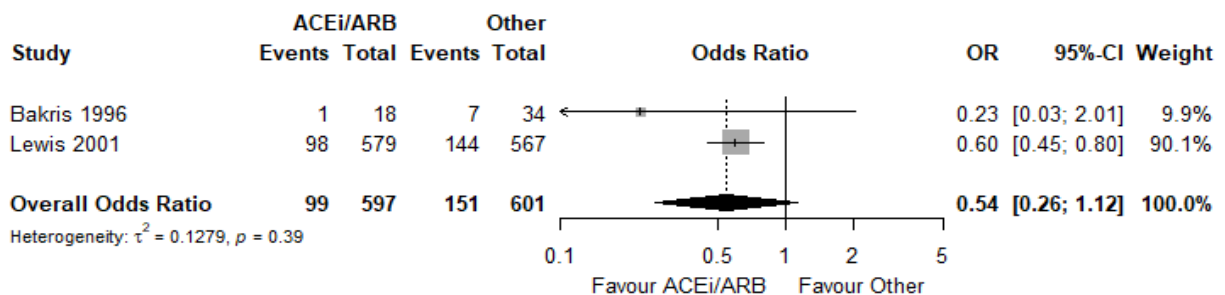

**Supp 2. Figure 3A: Forest plot for regression of albuminuria in trials comparing RAAS inhibitors *versus* placebo**

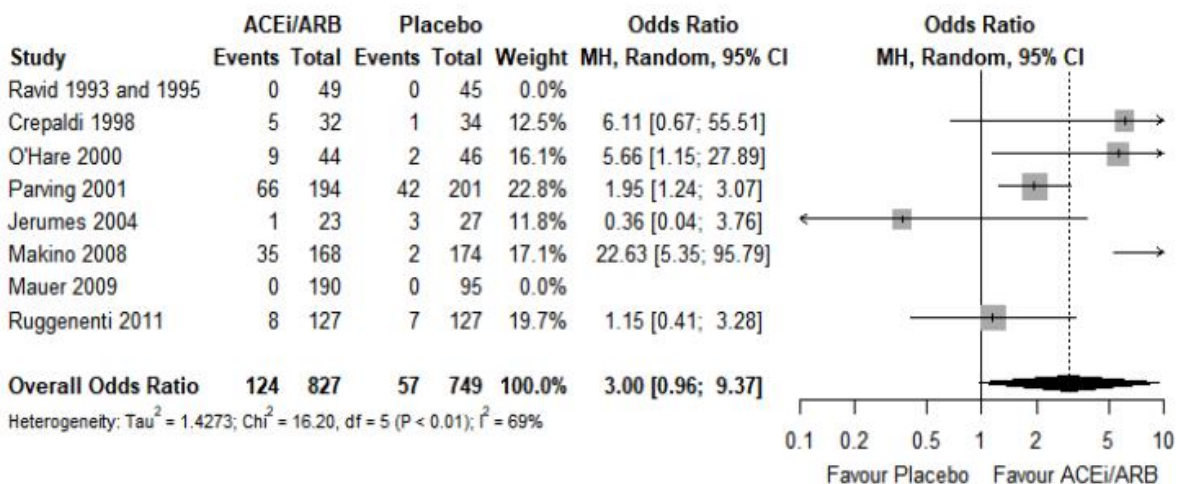

**Supp 2. Figure 3B: Forest plot for regression of albuminuria in trials comparing RAAS inhibitors *versus* other anti-hypertensives**

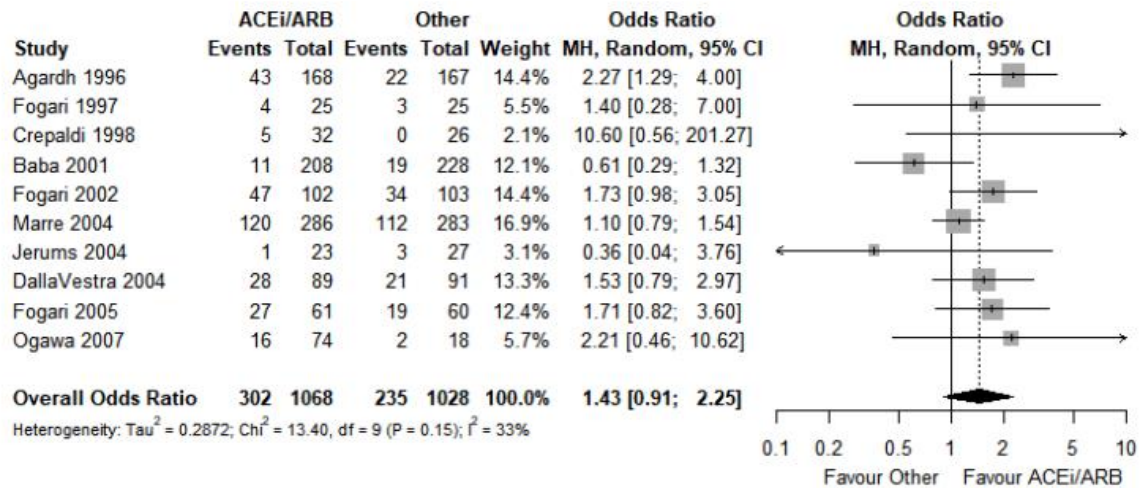

**Supp 2. Figure 4A: Forest plot for all-cause mortality in trials comparing RAAS inhibitors *versus* placebo**

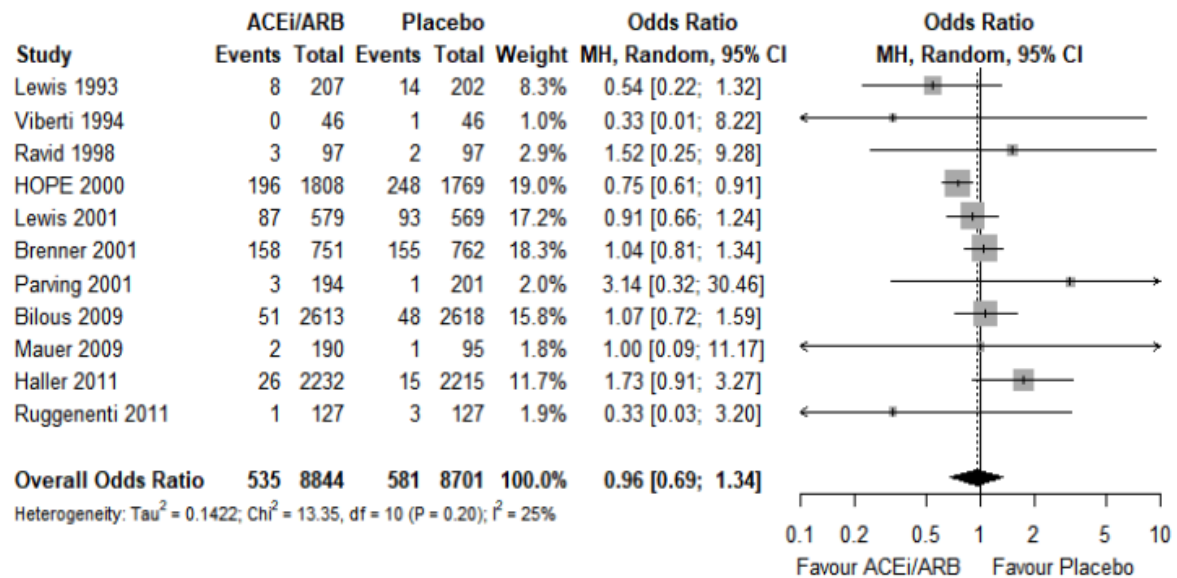

**Supp 2. Figure 4B: Forest plot for all-cause mortality in trials comparing RAAS inhibitors *versus* other anti-hypertensives**

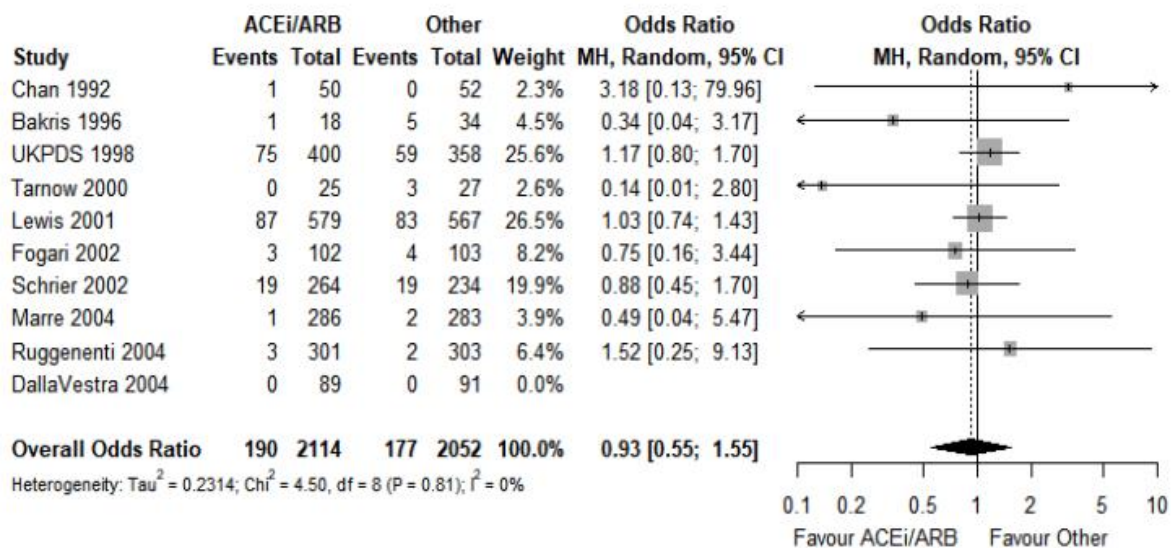

**Supp 2. Table 7: Meta analysis for binary outcomes of RAASi versus placebo**

| Table. Meta analysis for binary outcomes |               |                                  |          |                              |                     |
|------------------------------------------|---------------|----------------------------------|----------|------------------------------|---------------------|
| Outcome                                  | No. Of Trials | Pooled cumulative incidence rate |          | Heterogeneity I <sup>2</sup> | Odds ratio (95% CI) |
|                                          |               | RAASi                            | Placebo  |                              |                     |
| Kidney failure                           | 5             | 259/5577                         | 334/5517 | 0%                           | 0.74 (0.56; 0.97)*  |
| Doubling of SrCr                         | 5             | 310/3821                         | 401/3775 | 0% (0.43)                    | 0.71 (0.55; 0.91)*  |
| All-cause mortality                      | 11            | 535/8844                         | 581/8701 | 25%(0.20)                    | 0.96 (0.69; 1.34)   |
| Regression of Albuminuria                | 8             | 124/827                          | 57/749   | 69% (<0.01)                  | 3.00(0.96; 9.37)    |
| Require Anti-HTN                         | 10            | 472/3191                         | 675/3203 | 34% (0.13)                   | 0.39 (0.23;0.67)*   |
| Disruptive Cough                         | 5             | 52/613                           | 14/488   | 3% (0.39)                    | 2.67 (0.80; 8.89)   |

**Supp 2. Table 8: Meta analysis for binary outcomes of RAASi versus active treatments**

| Outcome        | No. Of Trials | Pooled cumulative incidence rate |                | Heterogeneity I <sup>2</sup> | Odds ratio (95% CI) |
|----------------|---------------|----------------------------------|----------------|------------------------------|---------------------|
|                |               | RAASi                            | Other Anti-HTN |                              |                     |
| Kidney failure | 4             | 88/1022                          | 115/986        | 0%(0.82)                     | 0.71 (0.40;1.28)    |

|                                  |    |          |          |            |                       |
|----------------------------------|----|----------|----------|------------|-----------------------|
| <b>Doubling of SrCr</b>          | 2  | 99/597   | 151/601  | 0% (0.39)  | 0.54 (0.26; 1.12)     |
| <b>All-cause mortality</b>       | 10 | 190/2114 | 177/2052 | 0% (0.81)  | 0.93 (0.55; 1.55)     |
| <b>Regression of Albuminuria</b> | 10 | 302/1068 | 235/1028 | 33% (0.15) | 1.43 (0.91;2.25)      |
| <b>Require Anti-HTN</b>          | 10 | 351/978  | 326/1018 | 58% (0.01) | 1.38 (0.84; 2.29)     |
| <b>Disruptive Cough</b>          | 9  | 97/1376  | 19/1431  | 7% (0.38)  | 6.57<br>(2.67;16.16)* |

**Supp 2. Table 9: Subgroup Analysis for kidney failure RAASi versus Placebo**

| <b>Table.</b>                           |                      |                                         |                |                                    |                            |
|-----------------------------------------|----------------------|-----------------------------------------|----------------|------------------------------------|----------------------------|
| <b>Subgroup Analysis According to :</b> | <b>No. Of Trials</b> | <b>Pooled cumulative incidence rate</b> |                | <b>Heterogeneity I<sup>2</sup></b> | <b>Odds ratio (95% CI)</b> |
|                                         |                      | <b>RAASi</b>                            | <b>Placebo</b> |                                    |                            |
| <b>Type of diabetes</b>                 |                      |                                         |                |                                    |                            |
| Type 1 DM                               | 1                    | 20/207                                  | 31/202         | NA                                 | 0.59 (0.32; 1.07)          |
| Type 2 DM                               | 3                    | 229/3562                                | 295/3546       | 0%(p=0.73)                         | 0.73 (0.60; 0.89)*         |
| Both                                    | 1                    | 10/1808                                 | 8/1769         | NA                                 | 1.22 (0.48; 3.11)          |
| <b>Albuminuria</b>                      |                      |                                         |                |                                    |                            |
| Normoalbuminuria                        | 1                    | 0/2232                                  | 0/2215         | NA                                 | NA                         |
| Mixed                                   | 1                    | 10/1808                                 | 8/1769         | NA                                 | 1.22 (0.48; 3.11)          |
| Macroalbuminuria                        | 2                    | 229/1330                                | 295/1331       | 0% (p=0.73)                        | 0.73 (0.60; 0.89)*         |
| Missing                                 | 1                    | 20/207                                  | 31/202         | NA                                 | 0.59 (0.32; 1.07)          |
| <b>CKD status</b>                       |                      |                                         |                |                                    |                            |
| CKD any stage                           | 4                    | 249/3769                                | 326/3748       | 0%(0.75)                           | 0.72 (0.59; 0.87)*         |
| No CKD                                  | 1                    | 10/1808                                 | 8/1769         | NA                                 | 1.22 (0.48; 3.11)          |
| <b>HTN status</b>                       |                      |                                         |                |                                    |                            |
| Yes                                     | 5                    | 259/5577                                | 334/5517       | 0% (0.62)                          | 0.74 (0.56; 0.97)*         |
| No                                      | 0                    |                                         |                |                                    |                            |
| <b>DM duration</b>                      |                      |                                         |                |                                    |                            |
| <10 years                               | 3                    | 229/3562                                | 295/3546       | 40%(0.20)                          | 0.78 (0.38; 1.59)          |
| ≥ 10 years                              | 2                    | 30/2015                                 | 39/1971        | 0%(p=0.73)                         | 0.73 (0.60; 0.89)*         |
| <b>Age categories</b>                   |                      |                                         |                |                                    |                            |

|                            |   |          |          |           |                    |
|----------------------------|---|----------|----------|-----------|--------------------|
| <60 years                  | 3 | 102/3018 | 132/2986 | 0% (0.45) | 0.72 (0.52; 0.98)* |
| ≥ 60 years                 | 2 | 157/2559 | 202/2531 | 18%(0.62) | 0.79 (0.50; 1.27)  |
| <b>BMI categories</b>      |   |          |          |           |                    |
| Missing                    | 1 | 20/207   | 31/202   | NA        | 0.59 (0.32; 1.07)  |
| <30                        | 2 | 157/2559 | 202/2531 | 18%(0.62) | 0.79 (0.50; 1.27)  |
| ≥30                        | 2 | 82/2811  | 101/2784 | NA        | 0.76 (0.56; 1.05)  |
| <b>Study size</b>          |   |          |          |           |                    |
| <100                       | 0 |          |          |           |                    |
| ≥100                       | 5 | 259/5577 | 334/5517 | 0         | 0.74 (0.56; 0.97)  |
| <b>Study duration</b>      |   |          |          |           |                    |
| ≤ 2years                   |   |          |          |           |                    |
| > 2years                   | 5 | 259/5577 | 334/5517 | 0% (0.62) | 0.74 (0.56; 0.97)* |
| <b>Year of Publication</b> |   |          |          |           |                    |
| <2000                      | 1 | 20/207   | 31/202   | NA        | 0.59 (0.32; 1.07)  |
| ≥2000                      | 4 | 239/5370 | 303/5315 | 0%        | 0.77 (0.58; 1.01)  |

**Supp 2. Table 10: Subgroup Analysis for kidney failure RAASi versus active treatments**

| Subgroup Analysis According to : | No. Of Trials | Pooled cumulative incidence rate |                | Heterogeneity I <sup>2</sup> | Odds ratio (95% CI) |
|----------------------------------|---------------|----------------------------------|----------------|------------------------------|---------------------|
|                                  |               | RAASi                            | Other Anti-HTN |                              |                     |
| <b>Type of diabetes</b>          |               |                                  |                |                              |                     |
| Type 1 DM                        | 1             | 2/25                             | 3/27           | NA                           | 0.70 (0.40; 1.28)   |
| Type 2 DM                        | 3             | 86/997                           | 112/959        | 0% (0.63)                    | 0.71 (0.33; 1.49)   |
| <b>Albuminuria</b>               |               |                                  |                |                              |                     |
| Macroalbuminuria                 | 3             | 84/622                           | 111/628        | 0% (0.66)                    | 0.68 (0.34; 1.37)   |
| Mixed                            | 1             | 4/400                            | 4/358          | NA                           | 0.89 (0.22; 3.60)   |
| <b>CKD status</b>                |               |                                  |                |                              |                     |
| CKD any stage                    | 3             | 84/622                           | 111/628        | 0% (0.66)                    | 0.68 (0.34; 1.37)   |
| No CKD                           | 1             | 4/400                            | 4/358          | NA                           | 0.89 (0.22; 3.60)   |
| <b>HTN status</b>                |               |                                  |                |                              |                     |

|                            |   |         |         |           |                      |
|----------------------------|---|---------|---------|-----------|----------------------|
| Yes                        | 4 | 88/1022 | 115/986 | 0% (0.82) | 0.71 (0.40; 1.28)    |
| No                         | 0 |         |         |           |                      |
| <b>DM duration</b>         |   |         |         |           |                      |
| <10 years                  | 1 | 4/400   | 4/358   | NA        | 0.89 (0.22; 3.60)    |
| ≥ 10 years                 | 2 | 2/43    | 7/61    | 0% (0.55) | 0.46 (0.08;2.57)     |
| Missing                    | 1 | 82/579  | 104/567 | 0% (0.82) | 0.73 (0.54;1.01)     |
| <b>Age categories</b>      |   |         |         |           |                      |
| <60 years                  | 3 | 88/1004 | 111/952 | 0% (0.96) | 0.74 (0.55; 1.01)    |
| ≥ 60 years                 | 1 | 0/18    | 4/34    | NA        | 0.18 (0.01;3.6)      |
| <b>BMI categories</b>      |   |         |         |           |                      |
| <30                        | 2 | 82/597  | 108/601 | 0% (0.36) | 0.63 (0.23; 1.77)    |
| ≥ 30                       | 2 | 6/425   | 7/385   | 0%(0.83)  | 0.82 (0.27; 2.51)    |
| <b>Study size</b>          |   |         |         |           |                      |
| <100                       | 2 | 2/43    | 7/61    | 0%(0.46)  | 0.46 (0.08; 2.57)    |
| ≥ 100                      | 2 | 86/979  | 108/925 | 0%(0.79)  | 0.74 (0.54;101)      |
| <b>Study duration</b>      |   |         |         |           |                      |
| ≤2years                    | 0 |         |         |           |                      |
| > 2years                   | 4 | 88/1022 | 115/986 | 0%(0.82)  | 0.71 (0.40;1.28)     |
| <b>Year of Publication</b> |   |         |         |           |                      |
| <2000                      | 2 | 4/418   | 8/392   | 0%(0.34)  | 0.60(0.12;3.00)      |
| ≥ 2000                     | 2 | 84/604  | 107/594 | 0% (0.96) | 0.73 (0.54;<br>1.00) |

**Supp 2. Table 11: Subgroup Analysis for doubling of SrCr in RAASi *versus* placebo**

| Subgroup Analysis       | No. Of Trials | Pooled cumulative incidence rate |          | Heterogeneity I <sup>2</sup> | Odds ratio (95% CI) |
|-------------------------|---------------|----------------------------------|----------|------------------------------|---------------------|
|                         |               | RAASi                            | Placebo  |                              |                     |
| <b>Type of diabetes</b> |               |                                  |          |                              |                     |
| Type 1 DM               | 2             | 27/259                           | 45/229   | 0% (0.99)                    | 0.51 (0.30; 0.85)*  |
| Type 2 DM               | 3             | 283/3562                         | 356/3546 | 0.0% (0.40)                  | 0.76 (0.60; 0.96)*  |
| Both                    |               |                                  |          |                              |                     |
| <b>Albuminuria</b>      |               |                                  |          |                              |                     |
| Missing                 | 2             | 27/259                           | 45/229   | 0% (0.35)                    | 0.51 (0.30; 0.85)*  |
| Macroalbuminuria        | 2             | 260/1330                         | 333/1331 | 0% (0.99)                    | 0.73 (0.59; 0.89)*  |
| Normoalbuminuria        | 1             | 23/2232                          | 23/2215  | NA                           | 0.99 (0.56; 1.77)   |
| <b>CKD status</b>       |               |                                  |          |                              |                     |
| CKD any stage           | 4             | 308/3769                         | 399/3748 | 19% (0.30)                   | 0.71 (0.55; 0.93)*  |



|                            |   |          |          |            |                       |
|----------------------------|---|----------|----------|------------|-----------------------|
| No CKD                     | 1 | 2/52     | 2/27     | NA         | 0.50 (0.07;3.76)      |
| <b>HTN status</b>          |   |          |          |            |                       |
| Yes                        | 5 | 310/3821 | 401/3775 | 0% (0.43)  | 0.71 (0.55;0.91)*     |
| No                         | 0 |          |          |            |                       |
| <b>DM duration</b>         |   |          |          |            |                       |
| <10 years                  | 1 | 23/2232  | 23/2215  | NA         | 0.99 (0.56; 1.77)     |
| ≥ 10 years                 | 2 | 27/259   | 45/229   | 0%(0.99)   | 0.51 (0.30;0.85)*     |
| Missing                    | 2 | 260/1330 | 333/1331 | 0% (0.99)  | 0.73 (0.59;<br>0.89)* |
| <b>Age categories</b>      |   |          |          |            |                       |
| < 60 years                 | 4 | 148/3070 | 203/3013 | 0% (0.41)  | 0.78 (0.62; 0.99)     |
| ≥ 60 years                 | 1 | 162/751  | 198/762  | NA         | 0.78 (0.62; 0.99)     |
| <b>BMI categories</b>      |   |          |          |            |                       |
| <30                        | 1 | 162/751  | 198/762  | NA         | 0.78(0.62; 0.99)      |
| ≥ 30                       | 2 | 121/2811 | 158/2784 | 36% (0.21) | 0.75 (0.50; 1.11)     |
| Missing                    | 2 | 27/259   | 45/229   | 0%(0.99)   | 0.51 (0.30;0.85)*     |
| <b>Study size</b>          |   |          |          |            |                       |
| < 100                      | 1 | 2/52     | 2/27     | NA         | 0.50 (0.07;3.76)      |
| ≥ 100                      | 4 | 308/3769 | 399/3748 | 19% (0.30) | 0.71 (0.55;<br>0.93)* |
| <b>Study duration</b>      |   |          |          |            |                       |
| ≤ 2years                   | 1 | 2/52     | 2/27     | NA         | 0.50 (0.07;3.76)      |
| > 2years                   | 4 | 308/3769 | 399/3748 | 19% (0.30) | 0.71 (0.55;<br>0.93)* |
| <b>Year of Publication</b> |   |          |          |            |                       |
| < 2000                     | 1 | 25/207   | 43/202   | NA         | 0.51 (0.30;0.85)*     |
| ≥ 2000                     | 4 | 285/3614 | 358/3573 | 0% (0.57)  | 0.75 (0.59;0.96)      |

**Supp 2. Table 12: Subgroup Analysis for doubling of SrCr in RAASi versus active treatments**

| Subgroup Analysis       | No. Of Trials | Pooled cumulative incidence rate |                | Heterogeneity I <sup>2</sup> | Odds ratio (95% CI) |
|-------------------------|---------------|----------------------------------|----------------|------------------------------|---------------------|
|                         |               | RAASi                            | Other Anti-HTN |                              |                     |
| <b>Type of diabetes</b> |               |                                  |                |                              |                     |
| Type 1 DM               | 0             |                                  |                |                              |                     |
| Type 2 DM               | 2             | 99/597                           | 151/601        | 0% (0.39)                    | 0.54 (0.26; 1.12)   |
| <b>Albuminuria</b>      |               |                                  |                |                              |                     |
| Macroalbuminuria        | 2             | 99/597                           | 151/601        | 0% (0.39)                    | 0.54 (0.26; 1.12)   |
| Mixed                   | 0             |                                  |                |                              |                     |
| <b>CKD status</b>       |               |                                  |                |                              |                     |
| CKD any stage           | 2             | 99/597                           | 151/601        | 0% (0.39)                    | 0.54 (0.26; 1.12)   |
| No CKD                  | 0             |                                  |                |                              |                     |

|                            |   |        |         |           |                    |
|----------------------------|---|--------|---------|-----------|--------------------|
| <b>HTN status</b>          |   |        |         |           |                    |
| Yes                        | 2 | 99/597 | 151/601 | 0% (0.39) | 0.54 (0.26; 1.12)  |
| No                         | 0 |        |         |           |                    |
| <b>DM duration</b>         |   |        |         |           |                    |
| < 10 years                 | 1 | 98/579 | 144/567 | NA        | 0.60 (0.45; 0.80)* |
| ≥ 10 years                 | 1 | 1/18   | 7/34    | NA        | 0.23 (0.03; 2.01)  |
| <b>Age categories</b>      |   |        |         |           |                    |
| < 60 years                 | 1 | 98/579 | 144/567 | NA        | 0.60 (0.45; 0.80)* |
| ≥ 60 years                 | 1 | 1/18   | 7/34    | NA        | 0.23 (0.03; 2.01)  |
| <b>BMI categories</b>      |   |        |         |           |                    |
| < 30                       | 0 |        |         |           |                    |
| ≥ 30                       | 2 | 99/597 | 151/601 | 0% (0.39) | 0.54 (0.26; 1.12)  |
| <b>Study size</b>          |   |        |         |           |                    |
| < 100                      | 1 | 1/18   | 7/34    | NA        | 0.23 (0.03; 2.01)  |
| ≥ 100                      | 1 | 98/579 | 144/567 | NA        | 0.60 (0.45; 0.80)* |
| <b>Study duration</b>      |   |        |         |           |                    |
| ≤ 2years                   | 0 |        |         |           |                    |
| > 2years                   | 2 | 99/597 | 151/601 | 0% (0.39) | 0.54 (0.26; 1.12)  |
| <b>Year of Publication</b> |   |        |         |           |                    |
| < 2000                     | 1 | 1/18   | 7/34    | NA        | 0.23 (0.03; 2.01)  |
| ≥ 2000                     | 1 | 98/579 | 144/567 | NA        | 0.60 (0.45; 0.80)* |

**Supp 2. Table 13: Subgroup Analysis for regression of albuminuria in RAASi versus placebo**

| Subgroup Analysis According to : | No. Of Trials | RAASi   | Placebo | Heterogeneity I <sup>2</sup> | Odds ratio (95% CI) |
|----------------------------------|---------------|---------|---------|------------------------------|---------------------|
| <b>Type of diabetes</b>          |               |         |         |                              |                     |
| Type 1 DM                        | 3             | 14/266  | 3/175   | 0%(0.96)                     | 5.81 (1.59;21.16)*  |
| Type 2 DM                        | 5             | 110/561 | 54/574  | 79%(0.01)                    | 2.26 (0.44; 11.45)  |
| <b>Albuminuria</b>               |               |         |         |                              |                     |
| Microalbuminuria                 | 6             | 116/510 | 50/527  | 72%(<.001)                   | 3.79 (1.02; 14.15)* |
| Normoalbuminuria                 | 1             | 0/190   | 0/95    | NA                           | NA                  |
| Mixed                            | 1             | 8/127   | 7/127   | NA                           | 1.15(0.41; 3.28)    |
| <b>CKD status</b>                |               |         |         |                              |                     |
| CKD any stage                    | 1             | 1/23    | 3/27    | NA                           | 0.36 (0.04; 3.76)   |
| No CKD                           | 7             | 123/804 | 54/722  | 71% (0.01)                   | 3.83 (1.35; 10.91)* |

|                            |   |         |        |             |                      |
|----------------------------|---|---------|--------|-------------|----------------------|
| <b>HTN status</b>          |   |         |        |             |                      |
| Yes                        | 2 | 74/321  | 49/328 | 0% (0.36)   | 1.74 (1.02; 2.94)*   |
| No                         | 5 | 15/338  | 6/247  | 52% (0.13)  | 2.59 (0.42; 15.84)   |
| Mixed                      | 1 | 35/168  | 2/174  | NA          | 22.63 (5.35; 95.79)* |
| <b>DM duration</b>         |   |         |        |             |                      |
| < 10 years                 | 5 | 110/561 | 54/574 | 79%(<0.01)  | 2.26(0.44; 11.45)    |
| ≥ 10 years                 | 3 | 14/266  | 3/175  | 0% (<0.01)  | 5.81 (1.59; 21.16)*  |
| <b>Age categories</b>      |   |         |        |             |                      |
| < 60 years                 | 6 | 81/532  | 48/448 | 35%(0.20)   | 2.35 (0.70; 7.93)    |
| ≥ 60 years                 | 2 | 43/295  | 9/301  | 91%(<0.01)  | 4.88(0.29; 91.95)    |
| <b>BMI categories</b>      |   |         |        |             |                      |
| < 30                       | 5 | 57/561  | 12/476 | 73%(0.01)   | 5.03 (1.39; 18.15)*  |
| ≥ 30                       | 1 | 66/194  | 42/201 | NA          | 1.95 (1.24; 307)*    |
| Missing                    | 2 | 1/72    | 3/72   | NA          | 0.36 (0.04;3.76)     |
| <b>Study size</b>          |   |         |        |             |                      |
| < 100                      | 3 | 6/104   | 4/106  | 66%         | 1.53 (0.11; 22.2)    |
| ≥ 100                      | 5 | 118/723 | 53/643 | 77% (<0.01) | 3.69 (1.04; 13.06)*  |
| <b>Study duration</b>      |   |         |        |             |                      |
| ≤ 2years                   | 3 | 110/406 | 46/421 | 82%(<0.01)  | 5.48 (1.35; 22.2)*   |
| > 2years                   | 5 | 14/421  | 11/328 | 35% (0.21)  | 1.35 (0.29; 6.31)    |
| <b>Year of Publication</b> |   |         |        |             |                      |
| < 2000                     | 2 | 5/81    | 1/79   | NA          | 6.11 (0.67; 55.1)    |
| ≥ 2000                     | 6 | 119/746 | 56/670 | 74% (<0.01) | 2.70 (0.72; 10.13)   |

**Supp 2. Table 14: Subgroup Analysis for regression of albuminuria in RAASi *versus* active treatment**

| <b>Subgroup Analysis According to :</b> | <b>No. Of Trials</b> | <b>RAASi</b> | <b>Other Anti-HTN</b> | <b>Heterogeneity I<sup>2</sup></b> | <b>Odds ratio (95% CI)</b> |
|-----------------------------------------|----------------------|--------------|-----------------------|------------------------------------|----------------------------|
| <b>Type of diabetes</b>                 |                      |              |                       |                                    |                            |
| Type 1 DM                               | 1                    | 5/32         | 0/26                  | NA                                 | 10.6(0.56; 201.27)         |
| Type 2 DM                               | 9                    | 297/1036     | 235/1002              | 31% (0.17)                         | 1.38 (0.96; 2.00)          |
| <b>Albuminuria</b>                      |                      |              |                       |                                    |                            |
| Microalbuminuria                        | 8                    | 248/692      | 194/633               | 0%(0.52)                           | 1.50 (0.90; 2.52)          |
| Mixed                                   | 2                    | 54/376       | 41/395                | 86%(<0.01)                         | 1.21 (0.36; 4.15)          |
| <b>CKD status</b>                       |                      |              |                       |                                    |                            |
| CKD any stage                           | 3                    | 55/399       | 44/422                | 76% (0.01)                         | 1.03 (0.36; 2.90)          |

|                            |   |          |         |             |                    |
|----------------------------|---|----------|---------|-------------|--------------------|
| No CKD                     | 7 | 247/669  | 191/606 | 0% (0.55)   | 1.54 (1.01; 2.36)* |
| <b>HTN status</b>          |   |          |         |             |                    |
| Yes                        | 8 | 296/1013 | 232/975 | 32% (0.17)  | 1.42 (1.02; 1.97)* |
| No                         | 2 | 6/55     | 3/53    | 68% (0.08)  | 1.72 (0.07; 41.25) |
| <b>DM duration</b>         |   |          |         |             |                    |
| < 10 years                 | 7 | 253/873  | 212/893 | 45%(0.09)   | 1.32 (0.85; 2.05)  |
| ≥ 10 years                 | 3 | 49/195   | 23/135  | 0% (0.43)   | 2.09(0.74; 5.93)   |
| <b>Age categories</b>      |   |          |         |             |                    |
| < 60 years                 | 4 | 53/248   | 28/245  | 18% (0.30)  | 1.76 (0.50; 6.17)  |
| ≥ 60 years                 | 6 | 249/820  | 207/783 | 25%(0.25)   | 1.30 (0.89; 1.89)  |
| <b>BMI categories</b>      |   |          |         |             |                    |
| < 30                       | 7 | 247/669  | 191/606 | 0% (0.15)   | 1.54(1.01; 2.36)*  |
| Missing                    | 3 | 55/399   | 44/422  | 76%(0.01)   | 1.03(0.36; 2.90)   |
| <b>Study size</b>          |   |          |         |             |                    |
| < 100                      | 4 | 26/154   | 8/96    | 10%(0.35)   | 1.67 (0.43; 6.50)  |
| ≥ 100                      | 6 | 276/914  | 227/932 | 49.5%(0.08) | 1.40 (0.96; 2.03)  |
| <b>Study duration</b>      |   |          |         |             |                    |
| ≤ 2years                   | 7 | 249/911  | 198/872 | 37%(0.15)   | 1.37 (0.94; 1.99)  |
| > 2years                   | 3 | 53/157   | 37/156  | 37% (0.21)  | 1.66 (0.29; 9.43)  |
| <b>Year of Publication</b> |   |          |         |             |                    |
| < 2000                     | 3 | 52/225   | 25/218  | 0%(0.50)    | 2.34 (0.84; 6.54)  |
| ≥ 2000                     | 7 | 250/843  | 210/810 | 22% (0.15)  | 1.26 (0.82; 1.93)  |

**Supp 2. Table 15: Subgroup Analysis for all-cause mortality in RAASi *versus* placebo**

| Subgroup Analysis According to : | No. Of Trials | RAASi    | Placebo  | Heterogeneity I <sup>2</sup> | Odds ratio (95% CI) |
|----------------------------------|---------------|----------|----------|------------------------------|---------------------|
| <b>Type of diabetes</b>          |               |          |          |                              |                     |
| Type 1 DM                        | 3             | 10/443   | 16/343   | 0% (0.85)                    | 0.56 (0.24; 1.33)   |
| Type 2 DM                        | 6             | 278/3980 | 269/3971 | 4% (0.39)                    | 1.14 (0.70;1.87)    |
| Both                             | 2             | 247/4421 | 296/4387 | 60% (0.12)                   | 0.85 (0.61; 1.19)   |
| <b>Albuminuria</b>               |               |          |          |                              |                     |
| Macroalbuminuria                 | 2             | 245/1330 | 248/1331 | 0% (0.49)                    | 0.99 (0.88; 1.21)   |
| Microalbuminuria                 | 2             | 3/240    | 2/247    | 21% (0.26)                   | 1.31 (0.13; 13.66)  |
| Normoalbuminuria                 | 4             | 82/5132  | 66/5025  | 0% (0.64)                    | 1.25 (0.86; 1.82)   |
| mixed                            | 2             | 197/1935 | 251/1896 | 0% (0.48)                    | 0.71 (0.42; 1.22)   |

|                            |    |          |          |            |                    |
|----------------------------|----|----------|----------|------------|--------------------|
| <b>CKD status</b>          |    |          |          |            |                    |
| CKD any stage              | 4  | 279/3769 | 277/3748 | 42% (0.16) | 1.01 (0.66; 1.54)  |
| No CKD                     | 7  | 256/5075 | 304/4953 | 0% (0.51)  | 0.91 (0.53; 1.58)  |
| <b>HTN status</b>          |    |          |          |            |                    |
| Yes                        | 8  | 530/8511 | 577/8463 | 45% (0.08) | 0.96 (0.66; 1.38)  |
| No                         | 3  | 5/333    | 4/238    | 0% (0.72)  | 1.02 (0.25; 4.06)  |
| <b>DM duration</b>         |    |          |          |            |                    |
| < 10 years                 | 4  | 33/2650  | 21/2640  | 0% (0.52)  | 1.46 (0.57; 3.73)  |
| ≥ 10 years                 | 5  | 257/4864 | 312/4730 | 0% (0.47)  | 0.81 (0.57; 1.14)  |
| Missing                    | 2  | 245/1330 | 248/1331 | 0% (0.49)  | 0.99(0.80; 1.21)   |
| <b>Age categories</b>      |    |          |          |            |                    |
| < 60 years                 | 8  | 180/6158 | 175/6043 | 0% (0.45)  | 1.05 (0.68; 1.62)  |
| ≥ 60 years                 | 3  | 355/2686 | 406/2658 | 59% (0.09) | 0.85 (0.54; 1.32)  |
| <b>BMI categories</b>      |    |          |          |            |                    |
| < 30                       | 6  | 411/5586 | 457/5468 | 22% (0.27) | 0.92 (0.68; 1.25)  |
| ≥ 30                       | 3  | 116/3005 | 109/2985 | 51% (0.13) | 1.26 (0.68; 2.32)  |
| Missing                    | 2  | 8/253    | 15/248   | 0% (0.77)  | 0.52 (0.22; 1.24)  |
| <b>Study size</b>          |    |          |          |            |                    |
| < 100                      | 1  | 0/46     | 1/46     | NA         | 0.33 (0.01; 8.22)  |
| ≥ 100                      | 10 | 535/8798 | 580/8655 | 31% (0.16) | 0.97 (0.70; 1.34)  |
| <b>Study duration</b>      |    |          |          |            |                    |
| ≤ 2years                   | 2  | 3/240    | 2/247    | 21% (0.20) | 1.31 (0.13; 13.66) |
| > 2years                   | 9  | 532/8604 | 579/8454 | 32% (0.16) | 0.95 (0.71; 1.26)  |
| <b>Year of Publication</b> |    |          |          |            |                    |
| < 2000                     | 3  | 11/350   | 17/345   | 0% (0.12)  | 0.66 (0.25; 1.75)  |
| ≥ 2000                     | 8  | 524/8844 | 564/8356 | 38% (0.12) | 1.1 (0.72; 1.41)   |

**Supp 2. Table 16: Subgroup Analysis for all-cause mortality in RAASi *versus* active treatments**

| Subgroup Analysis According to : | No. Of Trials | Pooled cumulative incidence rate |                | Heterogeneity I <sup>2</sup> | Odds ratio (95% CI) |
|----------------------------------|---------------|----------------------------------|----------------|------------------------------|---------------------|
|                                  |               | RAASi                            | Other Anti-HTN |                              |                     |
| <b>Type of diabetes</b>          |               |                                  |                |                              |                     |
| Type 1 DM                        | 1             | 0/25                             | 3/27           | NA                           | 0.14 (0.01; 2.80)   |
| Type 2 DM                        | 9             | 190/2089                         | 174/2025       | 0% (0.91)                    | 1.00 (0.67; 1.49)   |
| <b>Albuminuria</b>               |               |                                  |                |                              |                     |
| Macroalbuminuria                 | 3             | 88/622                           | 91/628         | 23% (0.27)                   | 0.66 (0.22; 2.03)   |
| Microalbuminuria                 | 3             | 4/477                            | 6/477          | 0%(0.77)                     | 0.67 (0.18; 2.42)   |

|                            |   |          |          |           |                      |
|----------------------------|---|----------|----------|-----------|----------------------|
| Normoalbuminuria           | 1 | 3/301    | 2/303    | NA        | 1.52 (0.25;<br>9.13) |
| Mixed                      | 3 | 95/714   | 78/644   | 0% (0.62) | 1.08 (0.64;<br>1.81) |
| <b>CKD status</b>          |   |          |          |           |                      |
| CKD any stage              | 5 | 108/936  | 110/914  | 0% (0.52) | 0.80 (0.33;<br>1.95) |
| No CKD                     | 5 | 82/1178  | 67/1138  | 0% (0.83) | 1.10 (0.68;<br>1.79) |
| <b>HTN status</b>          |   |          |          |           |                      |
| Yes                        | 9 | 171/1850 | 158/1818 | 0% (0.75) | 0.92 (0.50;<br>1.71) |
| No                         | 1 | 19/264   | 19/234   | NA        | 0.88 (0.45;<br>1.71) |
| <b>DM duration</b>         |   |          |          |           |                      |
| < 10 years                 | 6 | 102/1403 | 86/1333  | 0% (0.88) | 1.04 (0.66;<br>1.65) |
| ≥ 10 years                 | 3 | 1/132    | 8/152    | 0% (0.63) | 0.25 (0.04;1.52)     |
| Missing                    | 1 | 87/579   | 83/567   | NA        | 1.03 (0.74;<br>1.43) |
| <b>Age categories</b>      |   |          |          |           |                      |
| < 60 years                 | 5 | 182/1318 | 164/1238 | 0% (0.59) | 0.98 (0.47;<br>2.02) |
| ≥ 60 years                 | 5 | 8/796    | 13/814   | 0% (0.76) | 0.74 (0.27;2.00)     |
| <b>BMI categories</b>      |   |          |          |           |                      |
| < 30                       | 7 | 83/1253  | 70/1217  | 0%(0.68)  | 0.95 (0.41;<br>2.18) |
| ≥ 30                       | 3 | 107/861  | 107/835  | 0% (0.59) | 0.93 (0.56;1.53)     |
| <b>Study size</b>          |   |          |          |           |                      |
| < 100                      | 2 | 1/43     | 8/61     | 0%(0.63)  | 0.25 (0.04;<br>1.52) |
| ≥ 100                      | 8 | 189/2071 | 169/1991 | 0% (0.94) | 1.04 (0.74;1.46)     |
| <b>Study duration</b>      |   |          |          |           |                      |
| ≤ 2years                   | 3 | 2/425    | 2/426    | 0% (0.36) | 1.01 (0.11;<br>8.96) |
| > 2years                   | 7 | 188/1689 | 175/1626 | 0% (0.72) | 0.93 (0.56;1.55)     |
| <b>Year of Publication</b> |   |          |          |           |                      |
| < 2000                     | 3 | 77/468   | 64/444   | 0% (0.46) | 1.03 (0.35;<br>3.07) |
| ≥ 2000                     | 7 | 113/1646 | 113/1608 | 0% (0.78) | 0.88 (0.49;<br>1.58) |

**Supp 2. Table 17: Subgroup Analysis for disruptive cough in RAASi *versus* placebo**

| <b>Outcome</b>             | <b>number of studies</b> | <b>RAASi</b> | <b>Placebo</b> | <b>I<sup>2</sup> (p value)</b> | <b>pooled odds ratio (95%CI)</b> |
|----------------------------|--------------------------|--------------|----------------|--------------------------------|----------------------------------|
| <b>Type of Diabetes</b>    |                          |              |                |                                |                                  |
| T2DM                       | 3                        | 39/501       | 13/406         | 33% (0.22)                     | 1.78 (0.39; 8.06)                |
| T1DM                       | 2                        | 13/112       | 1/82           | 0% (0.75)                      | 6.47 (1.16; 36.28)*              |
| Both                       |                          |              |                |                                |                                  |
| <b>Albumin Status</b>      |                          |              |                |                                |                                  |
| Microalbuminuria           | 3                        | 13/158       | 3/128          | 49% (0.14)                     | 2.38 (0.22; 25.53)               |
| Normoalbuminuria           | 1                        | 18/190       | 4/95           | NA                             | 2.38 (0.78; 7.24)                |
| Mixed                      | 1                        | 21/265       | 7/265          | NA                             | 3.17 (1.32; 7.60)*               |
| <b>CKD</b>                 |                          |              |                |                                |                                  |
| No                         | 4                        | 31/348       | 7/223          | 25% (0.26)                     | 2.43 (0.48; 12.31)               |
| Missing                    | 1                        | 21/265       | 7/265          | NA                             | 3.17 (1.32; 7.60)*               |
| <b>HTN</b>                 |                          |              |                |                                |                                  |
| Normotensives              | 4                        | 43/553       | 13/457         | 20% (0.29)                     | 2.27 (0.53; 9.61)                |
| Hypertensives              | 1                        | 9/60         | 1/31           | NA                             | 5.29 (0.64; 43.87)               |
| <b>Diabetes duration</b>   |                          |              |                |                                |                                  |
| Missing                    | 1                        | 9/60         | 1/31           | NA                             | 5.29 (0.64; 43.87)               |
| < 10 years                 | 1                        | 4/52         | 0/51           | NA                             | 9.56 (0.50; 182.1)               |
| ≥ 10 years                 | 3                        | 39/501       | 13/406         | 33% (0.22)                     | 1.78 (0.39; 8.06)                |
| <b>Age category</b>        |                          |              |                |                                |                                  |
| < 60 years                 | 5                        | 52/613       | 14/488         | 3% (0.39)                      | 2.67 (0.80; 8.89)                |
| ≥ 60 years                 | 0                        |              |                |                                |                                  |
| <b>BMI category</b>        |                          |              |                |                                |                                  |
| Missing                    | 1                        | 0/46         | 2/46           | NA                             | 0.19 (0.01; 4.10)                |
| < 30                       | 2                        | 43/507       | 11/411         | 0% (0.48)                      | 3.07 (1.38; 43.87)*              |
| ≥ 30                       | 1                        | 9/60         | 1/31           | NA                             | 5.29 (0.64; 43.87)               |
| <b>Study size</b>          |                          |              |                |                                |                                  |
| < 100                      | 2                        | 9/106        | 3/77           | 67%(0.08)                      | 1.24 (0.05; 27.92)               |
| ≥ 100                      | 3                        | 43/507       | 11/411         | 0% (0.68)                      | 3.07 (1.38; 43.87)*              |
| <b>Study duration</b>      |                          |              |                |                                |                                  |
| ≤ 2years                   | 3                        | 30/371       | 10/342         | 41% (0.19)                     | 2.03 (0.32; 12.91)               |
| > 2years                   | 2                        | 22/242       | 4/146          | 0% (0.39)                      | 3.09 (0.80; 11.94)               |
| <b>Year of Publication</b> |                          |              |                |                                |                                  |
| < 2000                     | 4                        | 34/423       | 10/393         | 25% (0.39)                     | 2.72 (0.55; 13.58)               |
| ≥ 2000                     | 1                        | 18/190       | 4/95           | NA                             | 2.38 (0.78; 7.24)                |

**Supp 2. Table 18: Subgroup Analysis for disruptive cough in RAASi *versus* active treatment**

| <b>Outcome</b>             | <b>number of studies</b> | <b>RAASi</b> | <b>Other Anti-HTN</b> | <b>I<sup>2</sup> (p value)</b> | <b>pooled odds ratio (95%CI)</b> |
|----------------------------|--------------------------|--------------|-----------------------|--------------------------------|----------------------------------|
| <b>Type of Diabetes</b>    |                          |              |                       |                                |                                  |
| T2DM                       | 8                        | 89/1352      | 19/1407               | 1% (0.42)                      | 5.88 (2.30; 14.99)               |
| T1DM                       | 1                        | 8/24         | 0/24                  | NA                             | 25.24 (1.36; 467.87)             |
| <b>Albumin Status</b>      |                          |              |                       |                                |                                  |
| Macroalbuminuria           | 2                        | 12/42        | 0/58                  | 0% (0.94)                      | 23.29 (2.89; 187.83)             |
| Microalbuminuria           | 4                        | 13/657       | 2/675                 | 0% (0.80)                      | 4.30 (1.12; 16.48)               |
| Mixed                      | 2                        | 68/376       | 17/395                | 77% (0.04)                     | 9.78 (0.61, 156.59)              |
| Normoalbuminuria           | 1                        | 4/304        | 0/303                 | NA                             | 9.18 (0.49;171.28)               |
| <b>CKD</b>                 |                          |              |                       |                                |                                  |
| No                         | 5                        | 17/958       | 2/978                 | 0% (0.87)                      | 4.87 (1.44; 16.51)               |
| Yes                        | 4                        | 80/418       | 17/453                | 59% (0.06)                     | 10.30 (2.41; 44.03)              |
| <b>HTN</b>                 |                          |              |                       |                                |                                  |
| Normotensives              | 0                        |              |                       |                                |                                  |
| Hypertensives              | 9                        | 97/1376      | 19/1431               | 7% (0.38)                      | 6.57 (2.67; 16.16)               |
| <b>Diabetes duration</b>   |                          |              |                       |                                |                                  |
| Missing                    | 1                        | 3/208        | 1/228                 | NA                             | 3.32 (0.34; 32.19)               |
| < 10 years                 | 4                        | 74/963       | 18/981                | 39% (0.18)                     | 5.77 (1.27; 26.10)               |
| ≥ 10 years                 | 4                        | 20/205       | 0/222                 | 0% (0.946)                     | 14.72 (3.34; 64.95)              |
| <b>Age category</b>        |                          |              |                       |                                |                                  |
| < 60 years                 | 3                        | 56/266       | 17/264                | 0% (0.48)                      | 4.20 (1.37; 12.86)               |
| ≥ 60 years                 | 6                        | 41/1110      | 2/1167                | 0% (0.56)                      | 8.12(2.26; 29.21)                |
| <b>BMI category</b>        |                          |              |                       |                                |                                  |
| Missing                    | 2                        | 68/376       | 17/395                | 77%(0.04)                      | 9.78 (0.61; 156.6)               |
| < 30                       | 6                        | 25/982       | 2/1002                | 0% (0.81)                      | 6.22 (1.94; 19.92)               |
| ≥ 30                       | 1                        | 4/18         | 0/34                  | NA                             | 21.4 (1.08;423.9)                |
| <b>Study size</b>          |                          |              |                       |                                |                                  |
| < 100                      | 3                        | 15/250       | 1/286                 | 0%(0.46)                       | 10.04 (1.81;55.79)               |
| ≥ 100                      | 6                        | 82/1126      | 18/1145               | 13% (0.33)                     | 5.82 (1.95; 17.43)               |
| <b>Study duration</b>      |                          |              |                       |                                |                                  |
| ≤ 2years                   | 6                        | 81/1033      | 19/1070               | 8% (0.37)                      | 5.16 (1.73; 15.39)               |
| > 2years                   | 3                        | 16/343       | 0/361                 | 0% (0.88)                      | 17.02 (3.08; 93.92)              |
| <b>Year of Publication</b> |                          |              |                       |                                |                                  |
| < 2000                     | 3                        | 50/394       | 18/429                | 0% (0.45)                      | 3.94 (1.26; 12.33)               |
| ≥ 2000                     | 6                        | 47/982       | 1/1002                | 0% (0.57)                      | 10.8 (2.98; 37.11)               |



**Supp 2. Table 19: Subgroup Analysis for the need of additional antihypertensives in RAASi *versus* placebo**

| Outcome                    | number of studies | RAASi    | Placebo  | I <sup>2</sup> (p value) | pooled odds ratio (95%CI) |
|----------------------------|-------------------|----------|----------|--------------------------|---------------------------|
| <b>Type of Diabetes</b>    |                   |          |          |                          |                           |
| T2DM                       | 5                 | 189/445  | 258/451  | 41% (0.15)               | 0.32 (0.14; 0.72)*        |
| T1DM                       | 4                 | 8/133    | 21/134   | 0% (0.55)                | 0.36 (0.13; 0.97)*        |
| Both                       | 1                 | 275/2613 | 396/2618 | NA                       | 0.66 (0.56; 0.97)*        |
| <b>Albumin Status</b>      |                   |          |          |                          |                           |
| Microalbuminuria           | 7                 | 97/433   | 161/440  | 31%(0.19)                | 0.33 (0.15; 0.71)*        |
| Normoalbuminuria           | 1                 | 1/18     | 4/18     | NA                       | 0.66 (0.56;0.78)*         |
| Mixed                      | 1                 | 275/2613 | 396/2618 | NA                       | 0.40 (0.20;0.82)*         |
| Missing                    | 1                 | 99/127   | 114/127  | NA                       | 0.21 (0.02;2.06)*         |
| <b>CKD</b>                 |                   |          |          |                          |                           |
| No                         | 9                 | 470/3168 | 665/3176 | 28% (0.19)               | 0.42 (0.24; 0.73)*        |
| Yes                        | 1                 | 2/23     | 10/27    | NA                       | 0.16 (0.03;0.84)*         |
| <b>HTN</b>                 |                   |          |          |                          |                           |
| Normoalbuminuriatensives   | 7                 | 14/257   | 52/257   | 0% (0.61)                | 0.25 (0.11; 0.58)         |
| Hypertensives              | 3                 | 458/2934 | 623/2946 | 0% (0.39)                | 0.60 (0.46; 0.79)         |
| <b>Diabetes duration</b>   |                   |          |          |                          |                           |
| < 10 years                 | 6                 | 192/482  | 269/487  | 39% (0.14)               | 0.31 (0.16;0.61)*         |
| ≥ 10 years                 | 4                 | 280/2709 | 406/2716 | 0% (0.72)                | 0.62 (0.34; 1.12)         |
| <b>Age category</b>        |                   |          |          |                          |                           |
| < 60 years                 | 8                 | 370/3027 | 550/3040 | 28% (0.09)               | 0.41 (0.21; 0.80)*        |
| ≥ 60 years                 | 2                 | 102/164  | 125/163  | 0% (0.38)                | 0.34 (0.16; 0.71)*        |
| <b>BMI category</b>        |                   |          |          |                          |                           |
| Missing                    | 4                 | 5/136    | 27/136   | 0% (0.52)                | 0.19(0.06;0.63)*          |
| < 30                       | 5                 | 383/2861 | 535/2866 | 39% (0.16)               | 0.46 (0.26; 0.80)*        |
| ≥ 30                       | 1                 | 84/194   | 113/201  | NA                       | 0.59 (0.40; 0.89)*        |
| <b>Study size</b>          |                   |          |          |                          |                           |
| < 100                      | 6                 | 10/205   | 40/206   | 0% (0.48)                | 0.25 (0.10; 0.66)*        |
| ≥ 100                      | 4                 | 462/2986 | 635/2997 | 21% (0.13)               | 0.55 (0.38; 0.79)*        |
| <b>Study duration</b>      |                   |          |          |                          |                           |
| ≤2years                    | 2                 | 86/240   | 117/247  | 0% (0.81)                | 0.59 (0.40; 0.87)*        |
| > 2years                   | 8                 | 386/2951 | 558/2956 | 48% (0.81)               | 0.34 (0.18; 0.65)*        |
| <b>Year of Publication</b> |                   |          |          |                          |                           |
| < 2000                     | 4                 | 8/179    | 24/176   | 19% (0.3)                | 0.32 (0.09; 1.23)         |
| ≥ 2000                     | 6                 | 464/3012 | 648/3027 | 38% (0.16)               | 0.45 (0.28; 0.73)*        |

**Supp 2. Table 20: Subgroup Analysis for the need of additional antihypertensives in RAASi *versus* active treatment**

| Outcome                    | number of studies | RAASi   | Placebo | I <sup>2</sup> (p value) | pooled odds ratio (95%CI) |
|----------------------------|-------------------|---------|---------|--------------------------|---------------------------|
| <b>Type of Diabetes</b>    |                   |         |         |                          |                           |
| T2DM                       | 7                 | 334/903 | 309/947 | 72% (<0.01)              | 1.48 (0.77; 2.84)         |
| T1DM                       | 3                 | 17/75   | 17/71   | 0% (0.95)                | 1.07 (0.43; 2.68)         |
| <b>Albumin Status</b>      |                   |         |         |                          |                           |
| Macroalbuminuria           | 2                 | 32/43   | 48/61   | NA                       | 1.18 (0.40; 3.52)         |
| Microalbuminuria           | 4                 | 34/190  | 37/189  | 0% (1.00)                | 0.90 (0.53; 1.53)         |
| Mixed                      | 3                 | 91/426  | 52/447  | 86% (<10.01)             | 2.57 (0.69; 9.50)         |
| Missing                    | 1                 | 1/18    | 1/18    | NA                       | 1.00 (0.06; 17.33)        |
| Normoalbuminuria           | 1                 | 193/301 | 188/303 | NA                       | 1.09 (0.79; 1.52)         |
| <b>CKD</b>                 |                   |         |         |                          |                           |
| No                         | 5                 | 226/486 | 223/483 | 58% (0.05)               | 1.04 (0.78; 1.38)         |
| Yes                        | 5                 | 125/492 | 103/535 | 74% (<0.01)              | 1.88 (0.76; 4.61)         |
| <b>HTN</b>                 |                   |         |         |                          |                           |
| Normotensives              | 7                 | 346/905 | 320/947 | 71% (<0.01)              | 1.50 (0.81; 2.80)         |
| Hypertensives              | 3                 | 5/73    | 6/71    | 0% (0.99)                | 0.82 (0.24; 2.83)         |
| <b>Diabetes duration</b>   |                   |         |         |                          |                           |
| Missing                    | 1                 | 11/46   | 11/45   | NA                       | 0.97 (0.37; 2.54)         |
| <10 years                  | 5                 | 286/750 | 243/777 | 80% (<0.01)              | 1.79 (0.74; 4.33)         |
| ≥ 10 years                 | 4                 | 54/182  | 72/196  | 0% (0.98)                | 0.96 (0.55; 1.69)         |
| <b>Age category</b>        |                   |         |         |                          |                           |
| < 60 years                 | 5                 | 96/316  | 58/317  | 65% (<0.01)              | 1.86 (0.78; 4.42)         |
| ≥ 60 years                 | 5                 | 255/662 | 268/701 | 0% (0.99)                | 1.05 (0.81; 1.38)         |
| <b>BMI category</b>        |                   |         |         |                          |                           |
| < 30                       | 6                 | 270/543 | 243/554 | 75% (<0.01)              | 1.49 (0.68; 3.27)         |
| ≥ 30                       | 4                 | 63/417  | 49/440  | 0% (0.75)                | 1.37 (0.87; 2.17)         |
| <b>Study size</b>          |                   |         |         |                          |                           |
| < 100                      | 5                 | 48/162  | 65/177  | 0% (0.99)                | 0.99 (53; 185)            |
| ≥ 100                      | 5                 | 303/816 | 261/841 | 80% (<0.01)              | 1.71 (0.74; 3.98)         |
| <b>Study duration</b>      |                   |         |         |                          |                           |
| ≤2years                    | 5                 | 121/561 | 84/583  | 78% (<0.01)              | 1.71 (0.72; 4.09)         |
| > 2years                   | 5                 | 230/417 | 242/435 | 0% (0.99)                | 1.08 (0.79; 1.48)         |
| <b>Year of Publication</b> |                   |         |         |                          |                           |
| < 2000                     | 4                 | 108/314 | 82/324  | 79% (<0.01)              | 2.08 (0.67; 6.5)          |
| ≥ 2000                     | 6                 | 243/664 | 241/694 | 0% (1.00)                | 1.06 (0.81; 1.39)         |

**Supp 2. Table 21: Meta-analysis of withdrawal reasons in RAASi versus placebo**

| Withdrawal Reason      | No. Of Trials | Pooled cumulative incidence rate |          | Heterogeneity I <sup>2</sup> | Odds ratio (95% CI) |
|------------------------|---------------|----------------------------------|----------|------------------------------|---------------------|
|                        |               | RAASi                            | Placebo  |                              |                     |
| Due to hyperkalemia    | 5             | 22/1674                          | 8/1643   | 30%                          | 1.81 (0.42; 7.76)   |
| Due to AKI             | 3             | 38/1010                          | 54/991   | 32%                          | 0.69 (0.36; 1.32)   |
| Due to uncontrolled BP | 5             | 63/2321                          | 108/2230 | 0%                           | 0.50 (0.24; 1.03)   |
| Due to other reasons   | 12            | 910/5028                         | 923/4893 | 44%                          | 0.98 (0.59; 1.63)   |

**Supp 2. Table 22: Meta-analysis of withdrawal reasons in RAASi versus active treatments**

| Withdrawal Reason      | No. Of Trials | Pooled cumulative incidence rate |                | Heterogeneity I <sup>2</sup> | Odds ratio (95% CI) |
|------------------------|---------------|----------------------------------|----------------|------------------------------|---------------------|
|                        |               | RAASi                            | Other Anti-HTN |                              |                     |
| Due to hyperkalemia    | 1             | 11/579                           | 3/567          | NA                           | 3.64 (1.01; 13.12)  |
| Due to AKI             | 1             | 5/400                            | 0/358          | NA                           | 9.97 (0.55; 180.96) |
| Due to uncontrolled BP | 9             | 49/885                           | 40/908         | 0%                           | 1.34 (0.74; 2.42)   |
| Due to other reasons   | 15            | 88/1425                          | 106/1405       | 0%                           | 0.88 (0.59; 1.33)   |

**Supp 2. Table 23: Results for overall meta- analysis for RAASi versus Placebo or Other Anti-HTN drugs (Continuous outcomes)**

| Outcome     | Placebo-controlled studies |                               |             |                |                |           |
|-------------|----------------------------|-------------------------------|-------------|----------------|----------------|-----------|
|             | Number of studies          | Patient ratio (RAASi/placebo) | Effect size | C95% CI        | I <sup>2</sup> | P value * |
| SBP         | 17                         | 6691/6501                     | -3.32*      | -4.61; -2.03   | 58.0%          | 0.0017    |
| DBP         | 17                         | 6691/6501                     | -1.72*      | -2.51; -0.92   | 74%            | <0.0001   |
| Mean BP     | 8                          | 1749/1761                     | -1.78*      | -3.05; -0.51   | 78%            | <0.0001   |
| SrCr        | 4                          | 723/706                       | -13.4*      | -16.78; -10.01 | 93%            | 0.9267    |
| eGFR        | 12                         | 3087/2960                     | -0.24       | -1.45; 0.98    | 83%            | <0.0001   |
| Albuminuria | 15                         | 3525/3390                     | -60.8*      | -113.55; -8.06 | 98.30%         | <0.0001   |

| Outcome     | Other Anti-HTN drugs controlled studies |                             |             |               |                |           |
|-------------|-----------------------------------------|-----------------------------|-------------|---------------|----------------|-----------|
|             | Number of studies                       | Patient ratio (RAASi/Other) | Effect size | C95% CI       | I <sup>2</sup> | p value * |
| SBP         | 17                                      | 2893/2779                   | 0.3         | -1.62; 3.00   | 83.0%          | <0.0001   |
| DBP         | 17                                      | 2893/2779                   | 0.08        | -0.8; 0.96    | 58%            | 0.0016    |
| Mean BP     | 6                                       | 729/737                     | 0.22        | -1.35; 1.79   | 80.0%          | 0.0001    |
| SrCr        | 8                                       | 1150/1160                   | 0.03        | -6.4; 6.10    | 76%            | 0.0001    |
| eGFR        | 16                                      | 1234/1262                   | -0.25       | -2.70; 2.21   | 82%            | <0.0001   |
| Albuminuria | 18                                      | 1671/1712                   | -87.64      | -182.90; 7.63 | 95%            | <0.0001   |

\* The effect size is the Mean difference between the end of the study and the baseline except for eGFR we used the mean difference of the annual change

\*\*test of heterogeneity

### Supp 2. Table 24A: Sensitivity analysis results for overall meta- analysis after excluding outlier studies

| Outcome     | Placebo-controlled studies |             |              |                |           |
|-------------|----------------------------|-------------|--------------|----------------|-----------|
|             | Number of studies          | Effect size | 95% CI       | I <sup>2</sup> | p value * |
| SBP         | 15                         | -3.37       | -4.45; -2.29 | 39.90%         | 0.0055    |
| DBP         | 16                         | -1.91       | -2.61; -1.21 | 72%            | <0.0001   |
| Mean BP     | No outliers detected       |             |              |                |           |
| SrCr        | No outliers detected       |             |              |                |           |
| eGFR        | No outliers detected       |             |              |                |           |
| Albuminuria | No outliers detected       |             |              |                |           |

| Outcome     | Other Anti-HTN drugs controlled studies |             |               |                |           |
|-------------|-----------------------------------------|-------------|---------------|----------------|-----------|
|             | Number of studies                       | Effect size | 95% CI        | I <sup>2</sup> | p value * |
| SBP         | 15                                      | -0.45       | -2.08; 1.17   | 65%            | 0.0003    |
| DBP         | 16                                      | -0.099      | -0.82; 0.62   | 45%            | 0.0252    |
| Mean BP     | No outliers detected                    |             |               |                |           |
| SrCr        | No outliers detected                    |             |               |                |           |
| eGFR        | 14                                      | 0.13        | -0.72; 0.98   | 0%             | 0.9701    |
| Albuminuria | 17                                      | -30.85      | -59.21; -2.50 | 94%            | <0.0001   |

\* The effect size is the Mean difference except for eGFR we used the annual change.

\*\*test of heterogeneity

### Supp 2. Table 24B: Sensitivity analysis results for eGFR in RMD after excluding outlier studies

| Comparison                                 | No. of trials | No. of patients | RMD§  | 95% CI of RMD | I <sup>2</sup> | p value |
|--------------------------------------------|---------------|-----------------|-------|---------------|----------------|---------|
| <b>RAASi vs Placebo</b>                    |               |                 |       |               |                |         |
| All studies reporting the outcome included | 12            | 3087/2960       | -0.82 | -5.54; 3.91   | 86%            | <0.01   |
| Studies identified as outliers excluded*   | 11            | 2960/2806       | 0.55  | -3.81; 4.9    | 83%            | <0.01   |

| <b>RAASi vs Other Anti-HTN</b>               |    |           |       |              |     |       |
|----------------------------------------------|----|-----------|-------|--------------|-----|-------|
| All studies reporting the outcome included** | 16 | 1234/1262 | -1.21 | -4.51; 2.09  | 86% | <0.01 |
| Studies identified as outliers excluded      | 14 | 1170/1183 | -2.46 | -4.36; -0.56 | 55% | <0.01 |

§ RMD: Raw mean difference

\* Identified outliers (random-effects model) : "Ruggenti 2011"

\*\* Identified outliers (random-effects model) : "Bakris 1996", "Schnack 1996"

### Supp 2. Table 24C: Sensitivity analysis results for albuminuria in SMD after excluding outlier studies

| Comparison                                   | No. of trials | No. of patients | SMD§  | 95% CI of RMD | I <sup>2</sup> | p value |
|----------------------------------------------|---------------|-----------------|-------|---------------|----------------|---------|
| <b>RAASi vs Placebo</b>                      |               |                 |       |               |                |         |
| All studies reporting the outcome included   | 15            | 3525/3390       | -1.00 | -1.57; -0.44  | 96%            | <0.0001 |
| Studies identified as outliers excluded*     | 8             | 532/483         | -0.75 | -1.14; -0.37  | 85%            | <0.01   |
| <b>RAASi vs Other Anti-HTN</b>               |               |                 |       |               |                |         |
| All studies reporting the outcome included** | 18            | 1671/1712       | -0.55 | -0.95; -0.16  | 90%            | <0.0001 |
| Studies identified as outliers excluded      | 15            | 1444/1462       | -0.31 | -0.44; -0.18  | 58%            | <0.01   |

§ SMD: standardized mean difference

\*Identified outliers (random-effects model) : "Crepaldi 1998", "Bilous 2009", "Mauer 2009", "Viberti 1994", "Ahmad 1997", "Ahmad 2003", "Jerumes 2004"

\*\* Identified outliers (random-effects model): "Fogari 1999", "Baba 2001", "Tarnow 2000"

### Supp 2. Table 25: excluded studies from sensitivity analysis

| Outcome     | Studies excluded for RAASi vs Placebo comparison | Studies excluded for RAASi vs Other anti-HTN comparison |
|-------------|--------------------------------------------------|---------------------------------------------------------|
| SBP         | Ahmad 1997 ; O'hare 2000                         | Schnack 1996; Fuchs 2016                                |
| DBP         | Ahmad 2003                                       | Schnack1996                                             |
| Mean BP     | No studies excluded                              | No studies excluded                                     |
| SrCr        | No studies excluded                              | No studies excluded                                     |
| eGFR        | No studies excluded                              | Schnack 1996; Fogari 1997                               |
| Albuminuria | No studies excluded                              | Tarnow 2000                                             |
